# Supplementary material for: Acute ischaemic stroke outcomes following mechanical thrombectomy in the elderly versus their younger counterpart: a retrospective cohort study
Source: PubMed Central journal article supplement — BMJ Open. 2014 Mar 20;4(3):e004480. doi: 10.1136/bmjopen-2013-004480 (PMC3963096; doi:10.1136/bmjopen-2013-004480), 2014-03-20
Supplement: bmjopen-2013-004480.draft_revisions.pdf [file bmjopen-2013-004480.draft_revisions.pdf]

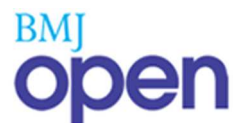

## Outcomes after mechanical thrombectomy in acute ischemic stroke patients over 80 years of age

|                                 |                                                                                                                                                                                                                                                                 |
|---------------------------------|-----------------------------------------------------------------------------------------------------------------------------------------------------------------------------------------------------------------------------------------------------------------|
| Journal:                        | <i>BMJ Open</i>                                                                                                                                                                                                                                                 |
| Manuscript ID:                  | bmjopen-2013-004480                                                                                                                                                                                                                                             |
| Article Type:                   | Research                                                                                                                                                                                                                                                        |
| Date Submitted by the Author:   | 15-Nov-2013                                                                                                                                                                                                                                                     |
| Complete List of Authors:       | Villwock, Mark; SUNY Upstate Medical University, Neurosurgery<br>Singla, Amit; SUNY Upstate Medical University, Neurosurgery<br>Padalino, David; SUNY Upstate Medical University, Neurosurgery<br>Deshaies, Eric; SUNY Upstate Medical University, Neurosurgery |
| <b>Primary Subject Heading</b>: | Cardiovascular medicine                                                                                                                                                                                                                                         |
| Secondary Subject Heading:      | Neurology, Emergency medicine, Surgery                                                                                                                                                                                                                          |
| Keywords:                       | Neurological injury < NEUROLOGY, Neurosurgery < SURGERY, VASCULAR SURGERY, HEALTH ECONOMICS, Stroke < NEUROLOGY, Neuroradiology < NEUROLOGY                                                                                                                     |
|                                 |                                                                                                                                                                                                                                                                 |

SCHOLARONE™  
Manuscripts

1  
2  
3 **Outcomes after mechanical thrombectomy in acute ischemic stroke patients**  
4 **over 80 years of age**  
5  
6  
7

8  
9  
10 Villwock, Mark R, Singla, Amit and Deshaies, Eric M  
11

12  
13  
14 Villwock, Mark R

15  
16 SUNY Upstate Medical University

17  
18 Neurosurgery

19  
20 750 East Adams Street

21  
22 Syracuse

23  
24 New York

25  
26 13210  
27

28  
29  
30 Singla, Amit

31  
32  
33 SUNY Upstate Medical University

34  
35 Neurosurgery

36  
37 750 East Adams Street

38  
39 Syracuse

40  
41 New York

42  
43 13210

44  
45  
46 United States  
47  
48  
49  
50  
51  
52  
53  
54  
55  
56  
57  
58  
59  
60

1  
2  
3 Deshaies, Eric M  
4

5  
6 SUNY Upstate Medical University  
7

8 Neurosurgery  
9

10 750 East Adams Street  
11

12 Syracuse  
13

14  
15 New York  
16

17 13210  
18  
19

20  
21  
22 United States  
23

24 Key words: endovascular therapy; stroke; thrombolysis; mechanical thrombectomy.  
25

26  
27 Word count: 2,720.  
28  
29  
30  
31  
32  
33  
34  
35  
36  
37  
38  
39  
40  
41  
42  
43  
44  
45  
46  
47  
48  
49  
50  
51  
52  
53  
54  
55  
56  
57  
58  
59  
60

**ABSTRACT**

**Objectives:** Many physicians debate the efficacy of mechanical thrombectomy for ischemic stroke, but most agree that to establish potential benefit, patient selection must be examined further. People >80 years are a growing population of ischemic stroke patients. The benefit of thrombectomy for them may be greatly reduced due to diminishing neuroplasticity and a larger number of medical co-morbidities. To address this knowledge gap, we examined clinical and economic outcomes after mechanical thrombectomy in the ischemic stroke population from the Nationwide Inpatient Sample. Our hypothesis was that elderly patients (> 80 years) would fare worse at discharge in comparison to their younger counterparts.

**Design:** Retrospective cohort study.

**Setting:** A 20-percent stratified sample of U.S. community hospitals within the Nationwide Inpatient Sample.

**Participants:** All patients from 2008-2010 with a primary diagnosis of ischemic stroke that received mechanical thrombectomy were included.

**Primary and secondary outcome measures:** The primary outcome was the adjusted odds-ratio of mortality. Secondary outcomes included the adjusted odds-ratio for discharge disposition, and the adjusted effect-ratios of hospital charges and length of stay.

**Results:** Less than 1% of all ischemic stroke cases (9,300) were treated with mechanical thrombectomy. Of these, 18% involved patients > 80 years. The odds of mortality in elderly patients treated with mechanical thrombectomy were more than double that of their younger counterparts (OR:2.107, P<.001) and there was a significant reduction in the odds of being discharged home (OR:0.297, P=.004). Although univariate analysis depicted a significant

1  
2  
3 difference in hospital charges and length of stay, multivariate analysis revealed no significant  
4  
5 differences.  
6  
7

8 **Conclusions:** The odds of mortality after mechanical thrombectomy in patients > 80 years was  
9  
10 twice that of their younger counterparts and few were eligible to be discharged home. Studies to  
11  
12 better identify specific subpopulations of patients that would benefit from mechanical  
13  
14 thrombectomy are needed urgently.  
15  
16  
17  
18  
19

### 20 **Strength and limitations of the study**

- 21  
22 • The strength of the study is the large number of included patients and the ability to study  
23  
24 medical practice at large without selection bias.  
25  
26
- 27 • Due to limitations in the database we could not control for disease specifics in each  
28  
29 population such as location/size of occlusion, collateral reperfusion, blood glucose level,  
30  
31 and admission NIHSS score.  
32  
33
- 34 • The time period of the study predated the arrival of stent-retriever devices, which may  
35  
36 prove to be safer and more efficacious than previous generation devices.  
37  
38  
39  
40  
41  
42  
43  
44  
45  
46  
47  
48  
49  
50  
51  
52  
53  
54  
55  
56  
57  
58  
59  
60

## INTRODUCTION

Controversy over the utility of endovascular mechanical thrombectomy (EMT) for acute ischemic stroke (AIS) has arisen since the Interventional Management of Stroke III trial (IMS III) was stopped in 2012 because of statistical futility.[1] Two additional trials, MR-RESCUE and SYNTHESIS Expansion, similarly failed to show any significant benefit with EMT for AIS.[1–3] Although individuals may disagree on the conclusions and debate the limitations of these trials, most agree that better selection criteria need to be established in order to identify potential subpopulations of patients who may benefit from EMT for AIS. Additionally, the cost-effectiveness of this intervention must be assessed and weighed in comparison to clinical outcomes. This is particularly important with the rise of health care costs in the USA, which at its current pace, is expected to reach one-fifth of the Gross Domestic Product by 2018.[4] Early debates of the Affordable Care Act centered on the creation of death panels to ration expenses. Although this panel was dismissed as myth, there remains a critical need to analyze the cost of newly-developed stroke interventions in an aging population that may not incur the same benefits as their younger peers due to lack of neuroplasticity and ongoing medical comorbidities.

The elderly population is expected to grow dramatically over the coming decades, specifically with the percentage of persons over 80 years of age doubling by 2050.[5] Given the growing percentage of elderly and their growing life expectancy, discussions regarding procedural risk versus clinical benefit will expand in importance, particularly with regards to costly interventions like EMT. The paucity of data on EMT, specifically in the elderly population, limits the

1  
2  
3 physician's ability to adequately counsel patients and their families regarding any potential  
4  
5 benefit from this emergent intervention.  
6  
7  
8  
9

10 To address this knowledge gap, we examined patient outcomes specific to in-hospital mortality,  
11 discharge disposition, and economic data (length of stay and hospital charges) after EMT in the  
12 elderly ischemic stroke population using the national databases.  
13  
14  
15  
16  
17  
18  
19

## 20 **METHODS**

21 We analyzed discharge data from the Nationwide Inpatient Sample (NIS), Healthcare Cost and  
22 Utilization Project (HCUP), Agency for Healthcare Research and Quality (Rockville, MD). This  
23 database represents approximately a 20% stratified sample of U.S. community hospitals.  
24  
25  
26  
27  
28

29 Detailed information on the design of the NIS is available at <http://www.hcup-us.ahrq.gov>. We  
30 examined the prevalence of EMT for AIS using data published from NIS for 2008 through 2010.  
31  
32  
33  
34  
35

36 Patients with AIS were identified in the NIS using the International Classification of Diseases,  
37 9<sup>th</sup> Revision, Clinical Modification (ICD-9-CM) codes (433.01, 433.11, 433.21, 433.31, 433.81,  
38 433.91, 434.01, 434.11, 434.91, and 437.1). Intervention utilizing EMT was identified using the  
39 ICD-9-CM procedure code 39.74, and pharmacological thrombolysis was documented with  
40 procedure code 99.10. Of note, there is no distinction in the ICD-9-CM code between intra-  
41 arterial and intra-venous administration of thrombolytics. Additionally, a hospital was classified  
42 as "high volume" if its total discharge stroke volume exceeded 147 cases per year.[6] Total  
43 hospital charges from 2008 and 2009 were compounded yearly at an inflation rate of 3% to  
44 standardize the charges at 2010 levels.  
45  
46  
47  
48  
49  
50  
51  
52  
53  
54  
55  
56  
57  
58  
59  
60

1  
2  
3  
4  
5  
6 Data were analyzed using SPSS Version 17 (IBM Corporation, Armonk NY, USA). To obtain  
7  
8 national estimates, discharge weights were applied. Patient discharge data and hospital  
9  
10 demographics were compared between patients >80 yrs of age and patients  $\leq$  80 yrs of age.  
11  
12 Additionally, outcomes were compared in the subset of patients > 80 years between those that  
13  
14 received pharmacological thrombolysis only and those that received EMT. Independent samples  
15  
16 t-tests, chi-squared tests, and Fisher's exact tests were used to make comparisons as appropriate.  
17  
18  
19  
20

21  
22 Accounting for hospital and patient level variation in outcome measures (length of stay, total  
23  
24 hospital charges, mortality, and discharge disposition), multivariate models were used to  
25  
26 compare and make inferences about differences between elderly patients versus younger patients,  
27  
28 and elderly patients receiving EMT versus pharmacological thrombolysis alone. This allows  
29  
30 comparison while adjusting for confounding variables included in the NIS dataset. The analysis  
31  
32 considered the following patient-specific factors: age, gender, race, patient income (<\$39,000,  
33  
34 \$39000 to \$47,999, \$48,000 to \$62,999, and  $\geq$ \$63,000), payer (Medicare, Medicaid, private  
35  
36 insurance, self-pay, or no charge), number of chronic conditions, and severity of illness (APR-  
37  
38 DRG severity of illness). The analysis also considered hospital-level factors including: region  
39  
40 (Northeast, Midwest, South, West), teaching status, hospital bed-size (small, medium, large),  
41  
42 hospital location (rural or urban), ownership of hospital (public, private non-profit, private for  
43  
44 profit), and whether the hospital was a "high volume" stroke center. Stepwise regression was  
45  
46 performed with variable entry when probability was less than 0.05 and removal when probability  
47  
48 exceeded 0.10.  
49  
50  
51  
52  
53  
54  
55  
56  
57  
58  
59  
60



1  
2  
3 Generalized linear models were used to analyze the outcome measures. A model using Gamma  
4 as the distribution and Log as the link function was used to calculate the estimated marginal  
5 means of the continuous variables including the total hospital charges and length of stay. The  
6 effect ratio was expressed as the quotient of the estimated marginal mean for patients > 80 yrs of  
7 age over the estimated marginal mean for patients  $\leq$  80 yrs of age; and the estimated marginal  
8 mean for patients > 80 years receiving EMT over the estimated marginal mean for patients > 80  
9 years receiving only pharmacological thrombolysis. The binary outcomes, mortality and  
10 discharge home, were analyzed in binary logistic regression. Odds ratios and their 95%  
11 confidence intervals were reported. Bonferroni correction for multiple tests resulted in a  
12 probability value  $<.0125$  ( $.05/4$ ) being considered statistically significant.  
13  
14  
15  
16  
17  
18  
19  
20  
21  
22  
23  
24  
25  
26  
27  
28

## 29 RESULTS

30  
31 Nationally, there were 1,674,200 acute ischemic stroke cases during the years 2008 through  
32 2010, 9,300 ( $< 1\%$ ) of which received EMT. The overall rate of mortality for all acute ischemic  
33 stroke cases was 7.9%. This rate increased to 23.8% when considering only patients receiving  
34 intervention with EMT. Patients greater than 80 yrs of age receiving EMT had a mortality rate of  
35 33.7%, significantly exceeding the rate for patients 80 yrs of age and younger that was found to  
36 be 21.6% ( $P < .001$ ) (Table 1). In comparison to younger patients, the patient over 80 was more  
37 likely to be a white female on Medicare and to have received pharmacological thrombolysis  
38 (Table 1).  
39  
40  
41  
42  
43  
44  
45  
46  
47  
48  
49  
50  
51  
52

53 Multivariate analysis was performed to examine the outcome variables while controlling for  
54 confounding factors (Table 2). The odds for mortality in patients older than 80 treated with EMT  
55  
56  
57  
58  
59  
60

1  
2  
3 were more than double in comparison to younger patients (OR 2.107, 95% CI: 1.549-2.866,  
4  
5 P<.001). Elderly patients also had a significant reduction in the odds of being discharged home  
6  
7 in comparison to their younger counterparts (OR 0.297, 95% CI: 0.131-0.673, P=.004). Although  
8  
9 univariate analysis depicted a significant difference in hospital charges and length of stay based  
10  
11 on age, the multivariate analysis revealed no significant differences (Table 2).  
12  
13

14  
15  
16  
17 Lastly, the effect of pharmacological thrombolysis was examined in patients > 80 years of age.  
18  
19 In comparison to the relatively small number of similarly aged patients treated with EMT (n =  
20  
21 1686), a drastic increase in the number of patients treated with thrombolysis was observed (n =  
22  
23 16493). Patients treated with thrombolysis alone had significantly reduced mortality in  
24  
25 comparison to those treated with EMT, 15.2% versus 33.7%, respectively (P < .001). These  
26  
27 patients also had a significantly greater rate of being discharged home, 9.0% versus 2.1% (P <  
28  
29 .001). Multivariate models documented the odds of mortality following EMT to significantly  
30  
31 increase by 84% in comparison to only thrombolysis; and hospital charges for cases involving  
32  
33 EMT increased by 73% in comparison to cases with only thrombolysis (Table 3).  
34  
35  
36  
37  
38  
39  
40

## 41 **DISCUSSION**

42  
43 The paucity of data on EMT in the elderly impedes the ability of physicians and patients to make  
44  
45 informed decisions. As this segment of the population is forecasted to dramatically increase,  
46  
47 additional information on the risk versus benefit of intervention will facilitate physician-patient  
48  
49 discussions.  
50  
51  
52  
53  
54  
55  
56  
57  
58  
59  
60

1  
2  
3 This study quantifies clinical and economic outcomes following EMT for AIS in patients older  
4 than 80 years of age across the US. The higher mortality and decreased functional outcome in  
5 patients aged over 80 years is in agreement with other database analyses involving AIS patients.  
6  
7  
8 For example, the Specialized Program of Translational Research in Acute Stroke (SPOTRIAS)  
9 examined patients  $\geq 80$  years of age that received intravenous rt-PA and/or intra-arterial  
10 therapy.[7] The database contained more than 1100 patients aged 80 years and greater. It  
11 documented a higher risk of in-hospital mortality for the elder stroke patient (OR: 2.13), but no  
12 difference in mortality rates between intervention modalities. Similarly, data from the European  
13 BIOMED Study of Stroke Care Group and the Safe Implementation of Thrombolysis in Stroke-  
14 Monitoring Study (SITS-MOST) registry reported outcomes from AIS patients aged  $> 80$  years,  
15 and documented higher mortality and worse functional outcomes.[8,9] Specifically, the SITS-  
16 MOST registry documented an increase in mortality by 18% for patients  $> 80$  years, and a 22%  
17 reduction in independence.[9]  
18  
19  
20  
21  
22  
23  
24  
25  
26  
27  
28  
29  
30  
31  
32  
33  
34  
35

36 The current study documented a significant increase in mortality for patients  $>80$  years of age  
37 receiving EMT in comparison to their same age counterparts receiving only pharmacological  
38 thrombolysis. This is in contrast to the findings of Willey et al. which concluded that intra-  
39 arterial therapy does not raise the risk of in-hospital mortality among those aged  $> 80$  years  
40 compared to treatment with intravenous thrombolysis alone.[7] Our study suggests an elevated  
41 risk of mortality in patients of this age group receiving EMT.  
42  
43  
44  
45  
46  
47  
48  
49  
50

51  
52  
53 Two possible reasons for this notable increase in mortality include: (1) older patients may  
54 respond poorly after prolonged general anesthesia commonly used for EMT, which other  
55  
56  
57  
58  
59  
60

1  
2  
3 researchers have cited to influence mortality,[10,11] and (2) different disease states in each  
4  
5 population. Patients receiving EMT likely had a higher NIHSS from a more proximal large  
6  
7 vessel occlusive lesion refractory to medical management and pharmacological thrombolysis. Of  
8  
9 those not in the refractory group, it can be presumed that the individual may have arrived to the  
10  
11 hospital after a prolonged time lapse from symptom onset, thereby leaving EMT as the last line  
12  
13 of therapy within the accepted time windows.  
14  
15

16  
17  
18  
19  
20 Due to limitations in the NIS we could not further investigate disease specifics in each  
21  
22 population such as location/size of occlusion, collateral reperfusion, blood glucose level, and  
23  
24 admission NIHSS score.[12–14] These variables are known to affect stroke outcome and the  
25  
26 distribution within each population is unknown. While this is a limitation of the analysis, it is  
27  
28 common to any large database study, and the benefits of large database examination include the  
29  
30 ability to study medical practice at large without selection bias. An additional limitation is that  
31  
32 the study outcomes do not include any specific neurological or functional assessment, as these  
33  
34 are not recorded in the NIS. The fact that a patient was discharged home may be influenced by  
35  
36 the payor status and social factors, rather than a true assessment of independence and self-care.  
37  
38  
39 Lastly, the data collected for NIS predates the arrival of stent-retriever devices, which may prove  
40  
41 to be safer and more efficacious than previous generation devices.  
42  
43  
44  
45  
46  
47

## 48 **CONCLUSION**

49  
50 EMT for AIS patients older than 80 years resulted in significantly increased mortality and  
51  
52 reduced functional independence in comparison to their younger counterparts. This is consistent  
53  
54 with the overall worse prognosis seen in the natural history of this age group. Studies to better  
55  
56  
57  
58  
59  
60

1  
2  
3 identify patients over 80 years of age that would benefit from EMT may improve outcomes and  
4  
5 reduce the gap currently observed in age stratifications. Ongoing endeavors to develop new  
6  
7  
8 revascularization devices may also improve AIS outcomes after EMT.  
9  
10  
11  
12  
13  
14  
15  
16  
17  
18  
19  
20  
21  
22  
23  
24  
25  
26  
27  
28  
29  
30  
31  
32  
33  
34  
35  
36  
37  
38  
39  
40  
41  
42  
43  
44  
45  
46  
47  
48  
49  
50  
51  
52  
53  
54  
55  
56  
57  
58  
59  
60

For peer review only

1  
2  
3 **Funding:** None  
4

5 **Contributorship Statement:** EMD and MV: study concept and design. MRV: acquisition of the  
6 data. MRV, AS, DJP, and EMD: analysis and interpretation of the data. MRV and EMD: drafting  
7 of the manuscript. AS and DJP: critical revision of the manuscript for important intellectual  
8 content. EMD: guarantor.  
9

10 **Competing Interests:** MRV: none. AS: none. DJP: none. EMD is a physician consultant for  
11 MicroVention, Covidien Neurovascular, Integra LifeSciences Corporation, and McKesson  
12 Health Solutions.  
13

14 **Ethics approval:** This study used the Nationwide Inpatient Sample, a de-identified patient  
15 database. Therefore, this study did not require IRB review in accordance with the Code of  
16 Federal Regulations, 45 CFR 46.  
17

18 **Data sharing statement:** Data were generated from the Nationwide Inpatient Sample, a  
19 publicly-available database. There is no additional data available  
20  
21  
22  
23  
24  
25  
26  
27  
28  
29  
30  
31  
32  
33  
34  
35  
36  
37  
38  
39  
40  
41  
42  
43  
44  
45  
46  
47  
48  
49  
50  
51  
52  
53  
54  
55  
56  
57  
58  
59  
60

## REFERENCES

- 1 Broderick JP, Palesch YY, Demchuk AM, *et al.* Endovascular therapy after intravenous t-PA versus t-PA alone for stroke. *N Engl J Med* 2013;**368**:893–903. doi:10.1056/NEJMoa1214300
- 2 Ciccone A, Valvassori L, Nichelatti M, *et al.* Endovascular treatment for acute ischemic stroke. *N Engl J Med* 2013;**368**:904–13. doi:10.1056/NEJMoa1213701
- 3 Kidwell CS, Jahan R, Gornbein J, *et al.* A trial of imaging selection and endovascular treatment for ischemic stroke. *N Engl J Med* 2013;**368**:914–23. doi:10.1056/NEJMoa1212793
- 4 Office of the Actuary in the centers for Medicare and Medicaid services. NHE projections 2008-2018. Centers Medicare Medicaid Serv. <http://www.cms.hhs.gov/nationalhealthexpenddata/downloads/proj2008.pds> (accessed 13 Feb2013).
- 5 Vincent G, Velkoff V. The next four decades: the older population in the United States: 2010 to 2050 CPR. *Us Census Bur* 2010;:25–1138.
- 6 Kimball MM, Neal D, Waters MF, *et al.* Race and Income Disparity in Ischemic Stroke Care: Nationwide Inpatient Sample Database, 2002 to 2008. *J Stroke Cerebrovasc Dis Off J Natl Stroke Assoc* Published Online First: 17 July 2012. doi:10.1016/j.jstrokecerebrovasdis.2012.06.004
- 7 Willey JZ, Ortega-Gutierrez S, Petersen N, *et al.* Impact of acute ischemic stroke treatment in patients >80 years of age: the specialized program of translational research in acute stroke (SPOTRIAS) consortium experience. *Stroke J Cereb Circ* 2012;**43**:2369–75. doi:10.1161/STROKEAHA.112.660993
- 8 Di Carlo A, Lamassa M, Pracucci G, *et al.* Stroke in the very old: clinical presentation and determinants of 3-month functional outcome: A European perspective. European BIOMED Study of Stroke Care Group. *Stroke J Cereb Circ* 1999;**30**:2313–9.
- 9 Ford GA, Ahmed N, Azevedo E, *et al.* Intravenous alteplase for stroke in those older than 80 years old. *Stroke J Cereb Circ* 2010;**41**:2568–74. doi:10.1161/STROKEAHA.110.581884
- 10 Abou-Chebl A, Lin R, Hussain MS, *et al.* Conscious sedation versus general anesthesia during endovascular therapy for acute anterior circulation stroke: preliminary results from a retrospective, multicenter study. *Stroke J Cereb Circ* 2010;**41**:1175–9. doi:10.1161/STROKEAHA.109.574129
- 11 John N, Mitchell P, Dowling R, *et al.* Is general anaesthesia preferable to conscious sedation in the treatment of acute ischaemic stroke with intra-arterial mechanical thrombectomy? A review of the literature. *Neuroradiology* 2013;**55**:93–100. doi:10.1007/s00234-012-1084-y

- 1  
2  
3  
4  
5  
6  
7  
8  
9  
10  
11  
12  
13  
14  
15  
16  
17  
18  
19  
20  
21  
22  
23  
24  
25  
26  
27  
28  
29  
30  
31  
32  
33  
34  
35  
36  
37  
38  
39  
40  
41  
42  
43  
44  
45  
46  
47  
48  
49  
50  
51  
52  
53  
54  
55  
56  
57  
58  
59  
60
- 12 Costalat V, Lobotesis K, Machi P, *et al.* Prognostic factors related to clinical outcome following thrombectomy in ischemic stroke (RECAST Study). 50 patients prospective study. *Eur J Radiol* Published Online First: 30 August 2012. doi:10.1016/j.ejrad.2012.07.012
  - 13 Ishkanian AA, McCullough-Hicks ME, Appelboom G, *et al.* Improving patient selection for endovascular treatment of acute cerebral ischemia: a review of the literature and an external validation of the Houston IAT and THRIVE predictive scoring systems. *Neurosurg Focus* 2011;**30**:E7. doi:10.3171/2011.3.FOCUS1144
  - 14 Natarajan SK, Dandona P, Karmon Y, *et al.* Prediction of adverse outcomes by blood glucose level after endovascular therapy for acute ischemic stroke. *J Neurosurg* 2011;**114**:1785–99. doi:10.3171/2011.1.JNS10884



## TABLES

**Table 1.** Patient- and hospital-level characteristics of the population receiving mechanical thrombectomy for acute ischemic stroke

|                                              | ≤ 80 yrs<br>(n = 7614 cases) | > 80 yrs<br>(n = 1686 cases) | <i>P</i> |
|----------------------------------------------|------------------------------|------------------------------|----------|
| Age                                          | 61.4 (14.0)                  | 85.2 (4.0)                   | <.001    |
| Gender, female                               | 46.9%                        | 66.7%                        | <.001    |
| Race, white                                  | 60.2%                        | 67.6%                        | .013     |
| Median income level                          |                              |                              |          |
| <\$39,000                                    | 26.7%                        | 23.5%                        |          |
| \$39,000 to \$47,999                         | 24.8%                        | 25.6%                        |          |
| \$48,000 to \$62,999                         | 23.6%                        | 23.5%                        | .607     |
| ≥\$63,000                                    | 24.9%                        | 27.4%                        |          |
| Payer, Medicare                              | 44.9%                        | 90.5%                        | <.001    |
| Number of chronic conditions                 | 7.1 (2.7)                    | 7.7 (2.7)                    | .001     |
| Number of procedures                         | 6.9 (3.2)                    | 6.4 (2.7)                    | .012     |
| APR-DRG severity of illness                  |                              |                              |          |
| Mild                                         | 0%                           | 0%                           |          |
| Moderate                                     | 1.5%                         | 0.6%                         |          |
| Major                                        | 53.5%                        | 53.9%                        | .418     |
| Extreme                                      | 45.0%                        | 45.5%                        |          |
| Thrombolysis (intravenous or intra-arterial) | 55.5%                        | 63.1%                        | .013     |
| Length of stay, days                         | 10.5 (10.2)                  | 9.4 (7.8)                    | .033     |
| Total charges, \$                            | 169,763 (125,050)            | 156,361 (103,574)            | .040     |
| Discharged home                              | 12.7%                        | 2.1%                         | <.001    |
| Mortality                                    | 21.6%                        | 33.7%                        | <.001    |
| Hospital owner                               |                              |                              |          |
| Government, non-federal                      | 22.6%                        | 18.8%                        |          |
| Private, non-profit                          | 69.2%                        | 74.6%                        | .150     |
| Private, investor-own                        | 8.2%                         | 6.6%                         |          |
| Teaching hospital                            | 84.2%                        | 80.6%                        | .122     |

Continuous variables expressed as: mean (SD).

**Table 2.** The effect of mechanical thrombectomy on patients > 80 years versus their younger counterparts with regards to mortality, discharge disposition, hospital charges, and length of stay after accounting for patient and hospital confounding factors.

|                   | Effect Ratio | 95% CI        | <i>P</i> |
|-------------------|--------------|---------------|----------|
| Mortality*        | 2.107        | 1.549 – 2.866 | <.001    |
| Discharged home*  | 0.297        | 0.131 – 0.673 | .004     |
| Hospital charges† | 0.948        | 0.879 – 1.022 | .164     |
| Length of stay ‡  | 0.948        | 0.845 – 1.063 | .360     |

\* OR: odds for patient > 80 yrs/odds for patient ≤ 80 yrs.

† Mean charge (\$) for patient > 80 yrs/mean charge for patient ≤ 80 yrs.

‡ Mean length (in days) for patient > 80 yrs/mean length for patient ≤ 80 yrs.

**Table 3.** The effect of mechanical thrombectomy compared to only thrombolysis in patients > 80 years with regards to mortality, discharge disposition, hospital charges, and length of stay after accounting for patient and hospital confounding factors.

|                   | Effect Ratio | 95% CI        | <i>P</i> |
|-------------------|--------------|---------------|----------|
| Mortality*        | 1.842        | 1.382 – 2.455 | <.001    |
| Discharged home*  | 0.394        | 0.179 – 0.866 | .020     |
| Hospital charges† | 1.733        | 1.603 – 1.876 | <.001    |
| Length of stay ‡  | 1.115        | 1.022 – 1.215 | .014     |

\* OR: odds for patient receiving mechanical thrombectomy/odds for patient receiving only thrombolysis.

† Mean charge (\$) for patient receiving mechanical thrombectomy/mean charge for patient receiving only thrombolysis.

‡ Mean length (in days) for patient receiving mechanical thrombectomy/mean length for patient receiving only thrombolysis.

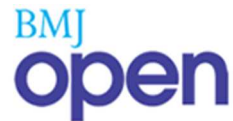

**Acute ischemic stroke outcomes following mechanical thrombectomy in the elderly versus their younger counterpart: a retrospective cohort study**

|                                 |                                                                                                                                                                                                                                                                 |
|---------------------------------|-----------------------------------------------------------------------------------------------------------------------------------------------------------------------------------------------------------------------------------------------------------------|
| Journal:                        | <i>BMJ Open</i>                                                                                                                                                                                                                                                 |
| Manuscript ID:                  | bmjopen-2013-004480.R1                                                                                                                                                                                                                                          |
| Article Type:                   | Research                                                                                                                                                                                                                                                        |
| Date Submitted by the Author:   | 21-Jan-2014                                                                                                                                                                                                                                                     |
| Complete List of Authors:       | Villwock, Mark; SUNY Upstate Medical University, Neurosurgery<br>Singla, Amit; SUNY Upstate Medical University, Neurosurgery<br>Padalino, David; SUNY Upstate Medical University, Neurosurgery<br>Deshaies, Eric; SUNY Upstate Medical University, Neurosurgery |
| <b>Primary Subject Heading</b>: | Cardiovascular medicine                                                                                                                                                                                                                                         |
| Secondary Subject Heading:      | Neurology, Emergency medicine, Surgery                                                                                                                                                                                                                          |
| Keywords:                       | Neurological injury < NEUROLOGY, Neurosurgery < SURGERY, VASCULAR SURGERY, HEALTH ECONOMICS, Stroke < NEUROLOGY, Neuroradiology < NEUROLOGY                                                                                                                     |
|                                 |                                                                                                                                                                                                                                                                 |

SCHOLARONE™  
Manuscripts

1  
2  
3  
4  
5  
6  
7  
8 Acute ischemic stroke outcomes following mechanical thrombectomy in the  
9 elderly versus their younger counterpart: a retrospective cohort study  
10  
11

12  
13  
14 Mark R. Villwock MS<sup>1</sup>, Amit Singla MD<sup>1</sup>, David J. Padalino MD<sup>1</sup>, Eric M. Deshaies, MD<sup>1\*</sup>  
15

16 <sup>1</sup>SUNY Upstate Medical University, Department of Neurosurgery, Syracuse, New York, USA  
17  
18

19  
20  
21 \*CORRESPONDING AUTHOR:  
22

23 Eric M. Deshaies, MD  
24

25 Director, SUNY Upstate Neurovascular Institute  
26

27 Director of Cerebrovascular, Endovascular, and Skull Base Neurosurgery  
28

29 Director, Neurosurgery Critical Care  
30

31 Associate Professor of Neurosurgery, Neuroscience and Physiology  
32

33 SUNY Upstate Medical University, Syracuse NY 13210 USA  
34

35 Phone: 1-315-464-5502  
36

37 Fax: 1-315-464-6373  
38

39 [DeshaieE@upstate.edu](mailto:DeshaieE@upstate.edu)  
40  
41  
42  
43  
44  
45  
46

47 Key words: endovascular therapy; stroke; thrombolysis; mechanical thrombectomy.  
48  
49

50  
51 Word count: 1,774.  
52  
53  
54  
55  
56  
57  
58  
59  
60

## ABSTRACT

**Objectives:** Many physicians debate the efficacy of mechanical thrombectomy for ischemic stroke, but most agree that to establish potential benefit, patient selection must be examined further. People >80 years are a growing population of ischemic stroke patients. The benefit of thrombectomy for them may be greatly reduced due to diminishing neuroplasticity and a larger number of medical co-morbidities. To address this knowledge gap, we examined clinical and economic outcomes after mechanical thrombectomy in the ischemic stroke population from the Nationwide Inpatient Sample. Our null hypotheses were that elderly patients (>80 years) would have a similar rate of inpatient mortality in comparison to their younger counterparts and incur a similar economic expense.

**Design:** Retrospective cohort study.

**Setting:** A 20-percent stratified sample of U.S. community hospitals within the Nationwide Inpatient Sample.

**Participants:** All patients from 2008-2010 with a primary diagnosis of ischemic stroke that received mechanical thrombectomy were included.

**Primary and secondary outcome measures:** The primary outcome was inpatient mortality. Secondary outcomes included hospital charges and length of stay.

**Results:** Less than 1% of all ischemic stroke cases (9,300) were treated with mechanical thrombectomy. Of these, 18% involved patients over 80 years of age. The odds of inpatient mortality in elderly patients treated with mechanical thrombectomy were approximately twice that of their younger counterparts (OR:1.993, P<.001). The elderly experienced no significant difference in hospital charges (P=.105) and length of stay (P=.498).

1  
2  
3 **Conclusions:** The odds of inpatient mortality after mechanical thrombectomy in patients over 80  
4  
5 years of age were twice that of their younger counterparts. This is consistent with the overall  
6  
7 worse prognosis seen in the natural history of this age group. Studies to better identify patients  
8  
9 that would benefit from EMT may improve outcomes and reduce the gap currently observed in  
10  
11 age stratifications.  
12  
13

### 14 15 16 17 **Strength and limitations of the study** 18

- 19  
20 • The strength of the study is the large number of included patients and the ability to study  
21  
22 medical practice at large without selection bias.  
23
- 24  
25 • Due to limitations in the database we could not control for disease specifics in each  
26  
27 population such as location/size of occlusion, collateral reperfusion, blood glucose level,  
28  
29 and admission NIHSS score.  
30
- 31  
32 • The time period of the study predated the arrival of stent-retriever devices, which may  
33  
34 prove to be safer and more efficacious than previous generation devices.  
35  
36  
37  
38  
39  
40  
41  
42  
43  
44  
45  
46  
47  
48  
49  
50  
51  
52  
53  
54  
55  
56  
57  
58  
59  
60

## INTRODUCTION

Controversy over the utility of endovascular mechanical thrombectomy (EMT) for acute ischemic stroke (AIS) has arisen since the Interventional Management of Stroke III trial (IMS III) was stopped in 2012 because of statistical futility.[1] Two additional trials, MR-RESCUE and SYNTHESIS Expansion, similarly failed to show any significant benefit with EMT for AIS.[1–3] Although individuals may disagree on the conclusions and debate the limitations of these trials, most agree that better selection criteria need to be established in order to identify potential subpopulations of patients who may benefit from EMT for AIS. Additionally, the cost-effectiveness of this intervention must be assessed and weighed in comparison to clinical outcomes. This is particularly important with the rise of health care costs in the USA, which at its current pace, is expected to reach one-fifth of the Gross Domestic Product by 2018.[4] Early debates of the Affordable Care Act centered on the creation of death panels to ration expenses. Although this panel was dismissed as myth, there remains a critical need to analyze the cost of newly-developed stroke interventions in an aging population that may not incur the same benefits as their younger peers due to lack of neuroplasticity and ongoing medical comorbidities.

The elderly population is expected to grow dramatically over the coming decades, specifically with the percentage of persons over 80 years of age doubling by 2050.[5] Given the growing percentage of elderly and their growing life expectancy, discussions regarding procedural risk versus clinical benefit will expand in importance, particularly with regards to costly interventions like EMT. The paucity of data on EMT, specifically in the elderly population, limits the



1  
2  
3 physician's ability to adequately counsel patients and their families regarding any potential  
4  
5 benefit from this emergent intervention.  
6  
7  
8  
9

10 To address this knowledge gap, we examined the elderly ischemic stroke population treated with  
11 EMT in a national database. Our null hypotheses were that elderly patients (> 80 years) would  
12 have a similar rate of inpatient mortality in comparison to their younger counterparts and incur a  
13 similar economic expense. The primary outcome was inpatient mortality. Secondary outcomes  
14 included hospital charges and length of stay.  
15  
16  
17  
18  
19  
20  
21  
22  
23  
24  
25  
26  
27  
28

## 29 **METHODS**

30 We analyzed discharge data from the Nationwide Inpatient Sample (NIS), Healthcare Cost and  
31 Utilization Project (HCUP), Agency for Healthcare Research and Quality (Rockville, MD). This  
32 database represents approximately a 20% stratified sample of U.S. community hospitals.  
33  
34  
35  
36  
37

38 Detailed information on the design of the NIS is available at <http://www.hcup-us.ahrq.gov>. We  
39 examined the prevalence of EMT for AIS using data published from NIS for 2008 through 2010.  
40  
41  
42  
43  
44

45 Patients with AIS were identified in the NIS using the International Classification of Diseases,  
46 9<sup>th</sup> Revision, Clinical Modification (ICD-9-CM) codes (433.01, 433.11, 433.21, 433.31, 433.81,  
47 433.91, 434.01, 434.11, 434.91, and 437.1). Intervention utilizing EMT was identified using the  
48 ICD-9-CM procedure code 39.74, and pharmacological thrombolysis was documented with  
49 procedure code 99.10. Of note, there is no distinction in the ICD-9-CM code between intra-  
50  
51  
52  
53  
54  
55  
56  
57  
58  
59  
60

1  
2  
3 arterial and intra-venous administration of thrombolytics. Additionally, a hospital was classified  
4 as “high volume” if its total discharge stroke volume exceeded 147 cases per year.[6] Total  
5 hospital charges from 2008 and 2009 were compounded yearly at an inflation rate of 3% to  
6 standardize the charges at 2010 levels. The length of hospital stay and associated hospital  
7 charges were only calculated for patients who did not die during their hospital course. This was  
8 done to eliminate the artificial shortening of these variables in cases involving a withdrawal of  
9 care. The comorbidity burden of each patient was expressed as the sum of the Elixhauser  
10 comorbidity measures.[7,8]  
11  
12  
13  
14  
15  
16  
17  
18  
19  
20  
21  
22  
23

24 Data were analyzed using SPSS Version 17 (IBM Corporation, Armonk NY, USA). To obtain  
25 national estimates, discharge weights were applied. Univariate comparisons were performed  
26 using Mann-Whitney U-tests and Chi-squared tests, as appropriate.  
27  
28  
29  
30  
31  
32  
33

34 Binary logistic regression was used to analyze the primary objective, inpatient mortality. The  
35 analysis considered the following factors known to affect stroke outcome: elderly age (>80 yrs),  
36 thrombolysis administration, presentation to a "high-volume" stroke center, gender, and All  
37 Patient Refined Diagnosis Related Group Severity of Illness (APR-DRG SOI). Backward  
38 stepwise regression was performed with variable entry when probability was less than 0.05 and  
39 removal when probability exceeded 0.10. Odds ratios and their 95% confidence intervals were  
40 reported.  
41  
42  
43  
44  
45  
46  
47  
48  
49  
50  
51  
52

53 Generalized linear models with the use of generalized estimated equations were used to analyze  
54 the economic measures. To meet the distributional requirements of a generalized linear model,  
55  
56  
57  
58  
59  
60

1  
2  
3 we used the logarithm of length of hospital stay and the logarithm of total inflation-adjusted  
4 charges as targeted outcomes in analyses. The exponential parameter estimates were reported  
5  
6 along with their 95% confidence intervals. A probability value of .01 was considered statistically  
7  
8 significant in order to nominally control for Type I error.  
9  
10  
11

## 12 13 14 15 **RESULTS**

16  
17 Nationally, there were 1,674,200 acute ischemic stroke cases during the years 2008 through  
18  
19 2010, 9,300 (< 1%) of which received EMT. Overall inpatient mortality for acute ischemic  
20  
21 stroke was 7.9%. This rate increased to 23.8% when considering only patients receiving  
22  
23 intervention with EMT. Patients greater than 80 yrs of age receiving EMT had an inpatient  
24  
25 mortality rate of 33.7%, significantly exceeding the rate for their younger counterpart that was  
26  
27 found to be 21.6% ( $P < .001$ ) (Table 1). In comparison to younger patients, the patient over 80  
28  
29 was more likely to be a white female on Medicare, to have received pharmacological  
30  
31 thrombolysis, and to not be discharged home (Table 1). Interestingly, no patients, young or  
32  
33 elderly, treated at low-volume stroke centers were discharged home (0/70). This is opposed to  
34  
35 10.8% of patients admitted to high-volume stroke centers ( $P=.004$ ).  
36  
37  
38  
39  
40  
41  
42

43  
44 Multivariate analysis was performed to examine the primary and secondary outcome measures  
45  
46 (Figure 1). The odds for inpatient mortality in the elderly treated with EMT were approximately  
47  
48 double in comparison to their younger counterpart (OR 1.993, 95% CI: 1.763-2.254,  $P<.001$ ).  
49

50  
51 The factors noted to significantly ( $P<.01$ ) reduce mortality were presentation to a high-volume  
52  
53 stroke center (OR=0.378), thrombolysis administration (OR=0.873), female gender (0.855), and  
54  
55 decreased severity of illness (Figure 1). There was no significant difference in hospital charges  
56  
57  
58  
59  
60

1  
2  
3 and length of stay for the elderly (Figure 1). The economic measures were most influenced by  
4  
5 severity of illness (Figure 1).  
6  
7  
8  
9

## 10 **DISCUSSION**

11  
12 The paucity of data on EMT in the elderly impedes the ability of physicians and patients to make  
13 informed decisions. As this segment of the population is forecasted to dramatically increase,  
14  
15 additional information on the risk versus benefit of intervention will facilitate physician-patient  
16  
17 discussions.  
18  
19  
20  
21

22  
23 This study quantifies clinical and economic outcomes following EMT for AIS in patients older  
24 than 80 years of age across the US. The higher mortality in patients aged over 80 years is in  
25 agreement with the overall worse prognosis seen in the natural history of this age group. For  
26  
27 example, the Specialized Program of Translational Research in Acute Stroke (SPOTRIAS)  
28  
29 examined patients  $\geq 80$  years of age that received intravenous rt-PA and/or intra-arterial  
30  
31 therapy.[9] The database contained more than 1100 patients aged 80 years and greater. It  
32  
33 documented a higher risk of in-hospital mortality for the elder stroke patient (OR: 2.13), but no  
34  
35 difference in mortality rates between intervention modalities. Similarly, data from the European  
36  
37 BIOMED Study of Stroke Care Group and the Safe Implementation of Thrombolysis in Stroke-  
38  
39 Monitoring Study (SITS-MOST) registry reported outcomes from AIS patients aged  $> 80$  years,  
40  
41 and documented higher mortality and worse functional outcomes.[10,11] Specifically, the SITS-  
42  
43 MOST registry documented an increase in mortality by 18% for patients  $> 80$  years, and a 22%  
44  
45 reduction in independence.[11]  
46  
47  
48  
49  
50  
51  
52  
53  
54  
55  
56  
57  
58  
59  
60

1  
2  
3 It is reassuring to note that the population of elderly patients in the present study exhibited  
4 similar mortality in comparison to the above mentioned thrombolysis trials. Patients in the  
5 current study were all treated with EMT, likely for one of two reasons: (1) failure of intravenous  
6 rt-PA to clear a proximal large vessel occlusive lesion, or (2) the individual arrived to the  
7 hospital after a prolonged time lapse from symptom onset, thereby leaving EMT as the last line  
8 of therapy within the accepted time windows. Both of these indications represent a group of  
9 exceptionally disease burdened patients.  
10  
11  
12  
13  
14  
15  
16  
17  
18  
19

20  
21  
22 The role of gender in stroke outcomes is not clearly defined. In agreement with our study,  
23 Saposnik et al.[12] reported on 12,262 AIS patients and noted the male sex to be a predictor of  
24 early mortality. Yet, Niewada et al.[13] reported the results of 17,370 AIS patients and  
25 documented that females had higher 14-day and 6-month mortality; while Adams et al.[14]  
26 collected data on 1,281 AIS patients and found no relationship between outcome and gender.  
27  
28 Further research is warranted to investigate any gender-effects with regard to AIS patients, and  
29 specifically those undergoing EMT.  
30  
31  
32  
33  
34  
35  
36  
37  
38  
39

40  
41 We anticipated increased expenses for the elderly with regard to their overall inpatient admission  
42 due to the larger number of chronic conditions, higher morbidity burden, and diminished  
43 efficiency of rehabilitation.[15,16] It was surprising to note no significant differences in the  
44 economic measures based on age. Although we must point out that our analysis does not reflect  
45 the true societal cost.[17–19] Long-term rehabilitation and care should be considered in future  
46 studies, but these measures were beyond the scope of the anonymized database used in this  
47 study.  
48  
49  
50  
51  
52  
53  
54  
55  
56  
57  
58  
59  
60

1  
2  
3  
4  
5  
6 Due to limitations in the NIS we could not further investigate disease specifics in each  
7  
8 population such as location/size of occlusion, collateral reperfusion, blood glucose level, and  
9  
10 admission NIHSS score.[20–22] These variables are known to affect stroke outcome and the  
11  
12 distribution within each population is unknown. While this is a limitation of the analysis, it is  
13  
14 common to any large database study, and the benefits of large database examination include the  
15  
16 ability to study medical practice at large without selection bias. An additional limitation is that  
17  
18 the primary and secondary objectives do not include any specific neurological or functional  
19  
20 assessment, as these are not recorded in the NIS. Discharge to home was not considered as a  
21  
22 primary objective as this variable may be influenced by the payor status and social factors, rather  
23  
24 than a true assessment of independence and self-care. Lastly, the data collected for NIS predates  
25  
26 the arrival of stent-retriever devices, which may prove to be safer and more efficacious than  
27  
28 previous generation devices.  
29  
30  
31  
32

## 33 34 35 36 **CONCLUSION**

37  
38 EMT for AIS patients older than 80 years of age resulted in significantly increased inpatient  
39  
40 mortality in comparison to their younger counterparts. This is consistent with the overall worse  
41  
42 prognosis seen in the natural history of this age group. Studies to better identify patients that  
43  
44 would benefit from EMT may improve outcomes and reduce the gap currently observed in age  
45  
46 stratifications. Ongoing endeavors to develop new revascularization devices may also improve  
47  
48 AIS outcomes after EMT.  
49  
50  
51  
52  
53  
54  
55  
56  
57  
58  
59  
60

1  
2  
3 **Conflicts-of-interest/Disclosures:** MRV: none. AS: none. DJP: none. EMD is a physician  
4 consultant for MicroVention, Covidien Neurovascular, Integra LifeSciences Corporation, and  
5  
6 McKesson Health Solutions.  
7  
8

9  
10 **Contributor statement:** EMD and MV: study concept and design. MRV: acquisition of the  
11 data. MRV, AS, DJP, and EMD: analysis and interpretation of the data. MRV and EMD: drafting  
12 of the manuscript. AS and DJP: critical revision of the manuscript for important intellectual  
13 content. EMD: guarantor.  
14  
15

16  
17  
18  
19 **Funding:** None  
20

21  
22 **Ethics approval:** This study used the Nationwide Inpatient Sample, a de-identified patient  
23 database. Therefore, this study did not require IRB review in accordance with the Code of  
24 Federal Regulations, 45 CFR 46.  
25  
26

27  
28  
29 **Data sharing statement:** Data were generated from the Nationwide Inpatient Sample, a  
30 publicly-available database. There is no additional data available.  
31  
32  
33  
34  
35  
36  
37  
38  
39  
40  
41  
42  
43  
44  
45  
46  
47  
48  
49  
50  
51  
52  
53  
54  
55  
56  
57  
58  
59  
60

## REFERENCES

- 1 Broderick JP, Palesch YY, Demchuk AM, *et al.* Endovascular therapy after intravenous t-PA versus t-PA alone for stroke. *N Engl J Med* 2013;**368**:893–903. doi:10.1056/NEJMoa1214300
- 2 Ciccone A, Valvassori L, Nichelatti M, *et al.* Endovascular treatment for acute ischemic stroke. *N Engl J Med* 2013;**368**:904–13. doi:10.1056/NEJMoa1213701
- 3 Kidwell CS, Jahan R, Gornbein J, *et al.* A trial of imaging selection and endovascular treatment for ischemic stroke. *N Engl J Med* 2013;**368**:914–23. doi:10.1056/NEJMoa1212793
- 4 Office of the Actuary in the centers for Medicare and Medicaid services. NHE projections 2008-2018. Centers Medicare Medicaid Serv. <http://www.cms.hhs.gov/nationalhealthexpenddata/downloads/proj2008.pds> (accessed 13 Feb2013).
- 5 Vincent G, Velkoff V. The next four decades: the older population in the United States: 2010 to 2050 CPR. *Us Census Bur* 2010;**25**:1138.
- 6 Kimball MM, Neal D, Waters MF, *et al.* Race and Income Disparity in Ischemic Stroke Care: Nationwide Inpatient Sample Database, 2002 to 2008. *J Stroke Cerebrovasc Dis* Published Online First: 17 July 2012. doi:10.1016/j.jstrokecerebrovasdis.2012.06.004
- 7 Elixhauser A, Steiner C, Harris DR, *et al.* Comorbidity measures for use with administrative data. *Med Care* 1998;**36**:8–27.
- 8 Vogel TR, Dombrovskiy VY, Haser PB, *et al.* Outcomes of carotid artery stenting and endarterectomy in the United States. *J Vasc Surg* 2009;**49**:325–330; discussion 330. doi:10.1016/j.jvs.2008.08.112
- 9 Willey JZ, Ortega-Gutierrez S, Petersen N, *et al.* Impact of acute ischemic stroke treatment in patients >80 years of age: the specialized program of translational research in acute stroke (SPOTRIAS) consortium experience. *Stroke* 2012;**43**:2369–75. doi:10.1161/STROKEAHA.112.660993
- 10 Di Carlo A, Lamassa M, Pracucci G, *et al.* Stroke in the very old: clinical presentation and determinants of 3-month functional outcome: A European perspective. European BIOMED Study of Stroke Care Group. *Stroke* 1999;**30**:2313–9.
- 11 Ford GA, Ahmed N, Azevedo E, *et al.* Intravenous alteplase for stroke in those older than 80 years old. *Stroke* 2010;**41**:2568–74. doi:10.1161/STROKEAHA.110.581884
- 12 Saposnik G, Kapral MK, Liu Y, *et al.* IScore: a risk score to predict death early after hospitalization for an acute ischemic stroke. *Circulation* 2011;**123**:739–49. doi:10.1161/CIRCULATIONAHA.110.983353



- 1  
2  
3 13 Niewada M, Kobayashi A, Sandercock PAG, *et al.* Influence of gender on baseline features  
4 and clinical outcomes among 17,370 patients with confirmed ischaemic stroke in the  
5 international stroke trial. *Neuroepidemiology* 2005;**24**:123–8. doi:10.1159/000082999  
6  
7
- 8 14 Adams HP Jr, Davis PH, Leira EC, *et al.* Baseline NIH Stroke Scale score strongly predicts  
9 outcome after stroke: A report of the Trial of Org 10172 in Acute Stroke Treatment  
10 (TOAST). *Neurology* 1999;**53**:126–31.  
11
- 12 15 Popa-Wagner A, Carmichael ST, Kokaia Z, *et al.* The response of the aged brain to stroke:  
13 too much, too soon? *Curr Neurovasc Res* 2007;**4**:216–27.  
14
- 15 16 Alemayehu B, Warner KE. The Lifetime Distribution of Health Care Costs. *Health Serv Res*  
16 2004;**39**:627–42. doi:10.1111/j.1475-6773.2004.00248.x  
17  
18
- 19 17 Dewey HM, Thrift AG, Mihalopoulos C, *et al.* Cost of stroke in Australia from a societal  
20 perspective: Results from the North East Melbourne Stroke Incidence Study (NEMESIS).  
21 *Stroke* 2001;**32**:2409–16.  
22
- 23 18 Kolominsky-Rabas PL, Heuschmann PU, Marschall D, *et al.* Lifetime cost of ischemic  
24 stroke in Germany: Results and national projections from a population-based stroke registry -  
25 The Erlangen Stroke Project. *Stroke* 2006;**37**:1179–83.  
26 doi:10.1161/01.STR.0000217450.21310.90  
27
- 28 19 Lee WC, Christensen MC, Joshi AV, *et al.* Long-term cost of stroke subtypes among  
29 medicare beneficiaries. *Cerebrovasc Dis* 2007;**23**:57–65. doi:10.1159/000096542  
30  
31
- 32 20 Costalat V, Lobotesis K, Machi P, *et al.* Prognostic factors related to clinical outcome  
33 following thrombectomy in ischemic stroke (RECAST Study). 50 patients prospective study.  
34 *Eur J Radiol* Published Online First: 30 August 2012. doi:10.1016/j.ejrad.2012.07.012  
35  
36
- 37 21 Ishkanian AA, McCullough-Hicks ME, Appelboom G, *et al.* Improving patient selection for  
38 endovascular treatment of acute cerebral ischemia: a review of the literature and an external  
39 validation of the Houston IAT and THRIVE predictive scoring systems. *Neurosurg Focus*  
40 2011;**30**:E7. doi:10.3171/2011.3.FOCUS1144  
41  
42
- 43 22 Natarajan SK, Dandona P, Karmon Y, *et al.* Prediction of adverse outcomes by blood  
44 glucose level after endovascular therapy for acute ischemic stroke. *J Neurosurg*  
45 2011;**114**:1785–99. doi:10.3171/2011.1.JNS10884  
46  
47  
48  
49  
50  
51  
52  
53  
54  
55  
56  
57  
58  
59  
60

**Table 1.** Patient- and hospital-level characteristics of the population receiving mechanical thrombectomy for acute ischemic stroke compared between the elderly and their younger counterpart.

|                                              | ≤ 80 yrs<br>(n = 7614 cases) | > 80 yrs<br>(n = 1686 cases) | <i>P</i> |
|----------------------------------------------|------------------------------|------------------------------|----------|
| Age                                          | 63 (53-73)                   | 84 (82-87)                   |          |
| Gender, female                               | 46.9%                        | 66.7%                        | <.001    |
| Race, white                                  | 60.2%                        | 67.6%                        | .013     |
| Median income level                          |                              |                              |          |
| <\$39,000                                    | 26.7%                        | 23.5%                        |          |
| \$39,000 to \$47,999                         | 24.8%                        | 25.6%                        |          |
| \$48,000 to \$62,999                         | 23.6%                        | 23.5%                        | .607     |
| ≥\$63,000                                    | 24.9%                        | 27.4%                        |          |
| Payer, Medicare                              | 44.9%                        | 90.5%                        | <.001    |
| Elixhauser comorbidity score                 |                              |                              |          |
| ≤ 2                                          | 37.2%                        | 30.6%                        |          |
| 3                                            | 21.7%                        | 26.5%                        | <.001    |
| ≥ 4                                          | 41.1%                        | 42.9%                        |          |
| APR-DRG severity of illness                  |                              |                              |          |
| Mild                                         | 0%                           | 0%                           |          |
| Moderate                                     | 1.5%                         | 0.6%                         |          |
| Major                                        | 53.5%                        | 53.9%                        | .418     |
| Extreme                                      | 45.0%                        | 45.5%                        |          |
| Thrombolysis (intravenous or intra-arterial) | 55.5%                        | 63.1%                        | .013     |
| Length of stay, days                         | 9 (5-14)                     | 9 (6-13.6)                   | .711     |
| Total charges, \$                            | 137,692 (95,139-207,687)     | 137,756 (87,582-198,103)     | .021     |
| Discharged home                              | 12.7%                        | 2.1%                         | <.001    |
| Inpatient mortality                          | 21.6%                        | 33.7%                        | <.001    |
| Hospital owner                               |                              |                              |          |
| Government, non-federal                      | 22.6%                        | 18.8%                        |          |
| Private, non-profit                          | 69.2%                        | 74.6%                        | .150     |
| Private, investor-own                        | 8.2%                         | 6.6%                         |          |
| Teaching hospital                            | 84.2%                        | 80.6%                        | .122     |

Continuous variables expressed as: median (25<sup>th</sup> percentile – 75<sup>th</sup> percentile).

**Figure Legend:**

**Figure 1.** Multivariate analysis of inpatient mortality and economic measures. Inpatient mortality expressed as the odds ratio along with the 95% confidence interval derived from binary logistic regression. Length of stay and charges are both expressed using the exponential parameter estimate along with the 95% confidence interval derived from generalized estimating equations. P-values are adjacent to the 95% confidence intervals. Points to the right of 1.0 reflect an increase in the odds/effect ratio relative to the indicated reference category. Points to the left of 1.0 reflect a decrease in the odds/effect ratio relative to the indicated reference category.

1/21

1  
2  
3  
4  
5  
6  
7  
8  
9  
10  
11  
12 Acute ischemic stroke outcomes following Outcomes after mechanical  
13 thrombectomy in the elderly versus their younger counterpart in acute ischemic  
14 stroke patients over 80 years of age: a retrospective cohort study  
15  
16  
17

Formatted: Not Highlight

Formatted: Not Highlight

Formatted: Not Highlight

18  
19 Mark R. Villwock MS<sup>1</sup>, Amit Singla MD<sup>1</sup>, David J. Padalino MD<sup>1</sup>, Eric M. Deshaies, MD<sup>1\*</sup>

20  
21 <sup>1</sup>SUNY Upstate Medical University, Department of Neurosurgery, Syracuse, New York, USA

22  
23  
24 \*CORRESPONDING AUTHOR:

25  
26 Eric M. Deshaies, MD

27  
28 Director, SUNY Upstate Neurovascular Institute

29  
30 Director of Cerebrovascular, Endovascular, and Skull Base Neurosurgery

31  
32 Director, Neurosurgery Critical Care

33  
34 Associate Professor of Neurosurgery, Neuroscience and Physiology

35  
36 SUNY Upstate Medical University, Syracuse NY 13210 USA

37  
38 Phone: 1-315-464-5502

39  
40 Fax: 1-315-464-6373

41  
42 [DeshaieE@upstate.edu](mailto:DeshaieE@upstate.edu)

43  
44  
45 Key words: endovascular therapy; stroke; thrombolysis; mechanical thrombectomy.

46  
47  
48  
49 Word count: 1,774858.

**ABSTRACT**

**Objectives:** Many physicians debate the efficacy of mechanical thrombectomy for ischemic stroke, but most agree that to establish potential benefit, patient selection must be examined further. People >80 years are a growing population of ischemic stroke patients. The benefit of thrombectomy for them may be greatly reduced due to diminishing neuroplasticity and a larger number of medical co-morbidities. To address this knowledge gap, we examined clinical and economic outcomes after mechanical thrombectomy in the ischemic stroke population from the Nationwide Inpatient Sample. Our null hypotheses were that elderly patients (>80 years) would have a similar rate of inpatient mortality in comparison to their younger counterparts and incur a similar economic expense~~Our hypothesis was that elderly patients (> 80 years) would fare worse at discharge in comparison to their younger counterparts.~~

**Design:** Retrospective cohort study.

**Setting:** A 20-percent stratified sample of U.S. community hospitals within the Nationwide Inpatient Sample.

**Participants:** All patients from 2008-2010 with a primary diagnosis of ischemic stroke that received mechanical thrombectomy were included.

**Primary and secondary outcome measures:** The primary outcome was ~~the adjusted odds ratio of inpatient~~ mortality. Secondary outcomes included ~~the adjusted odds ratio for discharge disposition, and the adjusted effect ratios of~~ hospital charges and length of stay.

**Results:** Less than 1% of all ischemic stroke cases (9,300) were treated with mechanical thrombectomy. Of these, 18% involved patients over> 80 years of age. The odds of inpatient mortality in elderly patients treated with mechanical thrombectomy were approximately twice more than double that of their younger counterparts (OR: 1.9932-1.07, P<.001)~~and there was~~

3/21

~~a significant reduction in the odds of being discharged home (OR:0.297, P=.004). Although univariate analysis depicted a~~The elderly experienced no significant difference in hospital charges (P=.105) and length of stay (P=.498); ~~multivariate analysis revealed no significant differences.~~

**Conclusions:** The odds of inpatient mortality after mechanical thrombectomy in patients over 80 years of age were twice that of their younger counterparts ~~and few were eligible to be discharged home.~~ This is consistent with the overall worse prognosis seen in the natural history of this age group. Studies to better identify patients that would benefit from EMT may improve outcomes and reduce the gap currently observed in age stratifications. Studies to better identify specific subpopulations of patients that would benefit from mechanical thrombectomy are needed urgently.

Formatted: Highlight

### Strength and limitations of the study

- The strength of the study is the large number of included patients and the ability to study medical practice at large without selection bias.
- Due to limitations in the database we could not control for disease specifics in each population such as location/size of occlusion, collateral reperfusion, blood glucose level, and admission NIHSS score.
- The time period of the study predated the arrival of stent-retriever devices, which may prove to be safer and more efficacious than previous generation devices.

### INTRODUCTION

Controversy over the utility of endovascular mechanical thrombectomy (EMT) for acute ischemic stroke (AIS) has arisen since the Interventional Management of Stroke III trial (IMS III) was stopped in 2012 because of statistical futility.[1] Two additional trials, MR-RESCUE and SYNTHESIS Expansion, similarly failed to show any significant benefit with EMT for AIS.[1–3] Although individuals may disagree on the conclusions and debate the limitations of these trials, most agree that better selection criteria need to be established in order to identify potential subpopulations of patients who may benefit from EMT for AIS. Additionally, the cost-effectiveness of this intervention must be assessed and weighed in comparison to clinical outcomes. This is particularly important with the rise of health care costs in the USA, which at its current pace, is expected to reach one-fifth of the Gross Domestic Product by 2018.[4] Early debates of the Affordable Care Act centered on the creation of death panels to ration expenses. Although this panel was dismissed as myth, there remains a critical need to analyze the cost of newly-developed stroke interventions in an aging population that may not incur the same benefits as their younger peers due to lack of neuroplasticity and ongoing medical comorbidities.

The elderly population is expected to grow dramatically over the coming decades, specifically with the percentage of persons over 80 years of age doubling by 2050.[5] Given the growing percentage of elderly and their growing life expectancy, discussions regarding procedural risk versus clinical benefit will expand in importance, particularly with regards to costly interventions like EMT. The paucity of data on EMT, specifically in the elderly population, limits the physician's ability to adequately counsel patients and their families regarding any potential benefit from this emergent intervention.

To address this knowledge gap, we examined ~~patient outcomes specific to in-hospital mortality, discharge disposition, and economic data (length of stay and hospital charges) after EMT in the~~ elderly ischemic stroke population treated with EMT in using the a national databases. Our null hypotheses were that elderly patients (> 80 years) would have a similar rate of inpatient mortality in comparison to their younger counterparts and incur a similar economic expense. The primary outcome was inpatient mortality. Secondary outcomes included hospital charges and length of stay.

## METHODS

We analyzed discharge data from the Nationwide Inpatient Sample (NIS), Healthcare Cost and Utilization Project (HCUP), Agency for Healthcare Research and Quality (Rockville, MD). This database represents approximately a 20% stratified sample of U.S. community hospitals.

Detailed information on the design of the NIS is available at <http://www.hcup-us.ahrq.gov>. We examined the prevalence of EMT for AIS using data published from NIS for 2008 through 2010.

Patients with AIS were identified in the NIS using the International Classification of Diseases, 9<sup>th</sup> Revision, Clinical Modification (ICD-9-CM) codes (433.01, 433.11, 433.21, 433.31, 433.81, 433.91, 434.01, 434.11, 434.91, and 437.1). Intervention utilizing EMT was identified using the ICD-9-CM procedure code 39.74, and pharmacological thrombolysis was documented with procedure code 99.10. Of note, there is no distinction in the ICD-9-CM code between intra-



arterial and intra-venous administration of thrombolytics. Additionally, a hospital was classified as “high volume” if its total discharge stroke volume exceeded 147 cases per year.[6] Total hospital charges from 2008 and 2009 were compounded yearly at an inflation rate of 3% to standardize the charges at 2010 levels. The length of hospital stay and associated hospital charges were only calculated for patients who did not die during their hospital course. This was done to eliminate the artificial shortening of these variables in cases involving a withdrawal of care. The comorbidity burden of each patient was expressed as the sum of the Elixhauser comorbidity measures.[7,8]

Data were analyzed using SPSS Version 17 (IBM Corporation, Armonk NY, USA). To obtain national estimates, discharge weights were applied. Univariate comparisons Patient discharge data and hospital demographics were compared between patients >80 yrs of age and patients ≤ 80 yrs of age were performed using . Additionally, outcomes were compared in the subset of patients > 80 years between those that received pharmacological thrombolysis only and those that received EMT. Mann-Whitney U-tests and CIndependent samples t tests, chi-squared tests, and Fisher’s exact tests, were used to make comparisons as appropriate.

Binary logistic regression Accounting for hospital and patient level variation in outcome measures (length of stay, total hospital charges, mortality, and discharge disposition); multivariate models were used to analyze the primary objective, inpatient mortality compare and make inferences about differences between elderly patients versus younger patients, and elderly patients receiving EMT versus pharmacological thrombolysis alone. This allows

7/21

comparison while adjusting for confounding variables included in the NIS dataset. The analysis considered the following patient specific factors known to affect stroke outcome: elderly age (>80 yrs), thrombolysis administration, presentation to a "high-volume" stroke center, gender, and All Patient Refined Diagnosis Related Group Severity of Illness (APR-DRG SOI). age, gender, race, patient income (<\$39,000, \$39000 to \$47,999, \$48,000 to \$62,999, and ≥\$63,000), payer (Medicare, Medicaid, private insurance, self pay, or no charge), number of chronic conditions, and severity of illness (APR-DRG severity of illness). The analysis also considered hospital level factors including: region (Northeast, Midwest, South, West), teaching status, hospital bed size (small, medium, large), hospital location (rural or urban), ownership of hospital (public, private non-profit, private for-profit), and whether the hospital was a "high volume" stroke center. Backward sStepwise regression was performed with variable entry when probability was less than 0.05 and removal when probability exceeded 0.10. Odds ratios and their 95% confidence intervals were reported.

Generalized linear models with the use of generalized -estimated equations linear models were used to analyze the economic outcome mmeasures. To meet the distributional requirements of a generalized linear model, we used the logarithm of length of hospital stay and the logarithm of total inflation-adjusted charges as targeted outcomes in analyses. A model using Gamma as the distribution and Log as the link function was used to calculate the estimated marginal means of the continuous variables including the total hospital charges and length of stay. The exponential parameter estimates were reported along with their 95% confidence intervals. effect ratio was expressed as the quotient of the estimated marginal mean for patients > 80 yrs of age over the

estimated marginal mean for patients  $\leq 80$  yrs of age; and the estimated marginal mean for patients  $> 80$  years receiving EMT over the estimated marginal mean for patients  $> 80$  years receiving only pharmacological thrombolysis. The binary outcomes, mortality and discharge home, were analyzed in binary logistic regression. Odds ratios and their 95% confidence intervals were reported. A probability value of .01 was Bonferroni correction for multiple tests resulted in a probability value  $< .0125$  (.05/4) being considered statistically significant in order to nominally control for Type I error.

## RESULTS

Nationally, there were 1,674,200 acute ischemic stroke cases during the years 2008 through 2010, 9,300 ( $< 1\%$ ) of which received EMT. The overall rate of inpatient mortality for all acute ischemic stroke cases was 7.9%. This rate increased to 23.8% when considering only patients receiving intervention with EMT. Patients greater than 80 yrs of age receiving EMT had an inpatient mortality rate of 33.7%, significantly exceeding the rate for their younger counterpart patients 80 yrs of age and younger that was found to be 21.6% ( $P < .001$ ) (Table 1). In comparison to younger patients, the patient over 80 was more likely to be a white female on Medicare, and to have received pharmacological thrombolysis, and to not be discharged home (Table 1). Interestingly, no patients, young or elderly, treated at low-volume stroke centers were discharged home (0/70). This is opposed to 10.8% of patients admitted to high-volume stroke centers ( $P=.004$ ).

Multivariate analysis was performed to examine the primary and secondary outcome measures variables while controlling for confounding factors (Figure 1 Table 2). The odds for inpatient

Formatted: Not Highlight

Formatted: Not Highlight

Formatted: Not Highlight

9/21

mortality in ~~the elderly patients older than 80~~ treated with EMT were ~~approximately more than~~ double in comparison to ~~their~~ younger ~~counterpart~~patients (OR ~~1.9932-107~~, 95% CI: ~~1.763549-2.866254~~,  $P < .001$ ). ~~The factors noted to significantly ( $P < .01$ ) reduce mortality were presentation to a high-volume stroke center (OR=0.378), thrombolysis administration (OR=0.873), female gender (0.855), and decreased severity of illness (Figure 1). Elderly patients also had a significant reduction in the odds of being discharged home in comparison to their younger counterparts (OR 0.297, 95% CI: 0.131-0.673,  $P = .004$ ). Although univariate analysis depicted ~~a~~There was no significant difference in hospital charges and length of stay for the elderly (Figure 1). The economic measures were most influenced by severity of illness (Figure 1). ~~based on age,~~ the multivariate analysis revealed no significant differences (Table 2).~~

Lastly, the effect of pharmacological thrombolysis was examined in patients  $> 80$  years of age. In comparison to the relatively small number of similarly aged patients treated with EMT ( $n = 1686$ ), a drastic increase in the number of patients treated with thrombolysis was observed ( $n = 16493$ ). Patients treated with thrombolysis alone had significantly reduced mortality in comparison to those treated with EMT, 15.2% versus 33.7%, respectively ( $P < .001$ ). These patients also had a significantly greater rate of being discharged home, 9.0% versus 2.1% ( $P < .001$ ). Multivariate models documented the odds of mortality following EMT to significantly increase by 84% in comparison to only thrombolysis; and hospital charges for cases involving EMT increased by 73% in comparison to cases with only thrombolysis (Table 3).

## DISCUSSION

Formatted: Not Highlight

10/21

1  
2  
3  
4  
5  
6  
7  
8  
9 The paucity of data on EMT in the elderly impedes the ability of physicians and patients to make  
10 informed decisions. As this segment of the population is forecasted to dramatically increase,  
11 additional information on the risk versus benefit of intervention will facilitate physician-patient  
12 discussions.  
13  
14  
15  
16

17  
18 This study quantifies clinical and economic outcomes following EMT for AIS in patients older  
19 than 80 years of age across the US. The higher mortality ~~and decreased functional outcome~~ in  
20 patients aged over 80 years is in agreement with the overall worse prognosis seen in the natural  
21 history of this age group. ~~other database analyses involving AIS patients.~~ For example, the  
22 Specialized Program of Translational Research in Acute Stroke (SPOTRIAS) examined patients  
23  $\geq 80$  years of age that received intravenous rt-PA and/or intra-arterial therapy.<sup>[9][7]</sup> The  
24 database contained more than 1100 patients aged 80 years and greater. It documented a higher  
25 risk of in-hospital mortality for the elder stroke patient (OR: 2.13), but no difference in mortality  
26 rates between intervention modalities. Similarly, data from the European BIOMED Study of  
27 Stroke Care Group and the Safe Implementation of Thrombolysis in Stroke-Monitoring Study  
28 (SITS-MOST) registry reported outcomes from AIS patients aged  $> 80$  years, and documented  
29 higher mortality and worse functional outcomes.<sup>[10,11][8,9]</sup> Specifically, the SITS-MOST  
30 registry documented an increase in mortality by 18% for patients  $> 80$  years, and a 22%  
31 reduction in independence.<sup>[11][9]</sup>

32  
33  
34  
35  
36  
37  
38  
39  
40  
41  
42  
43  
44  
45  
46 It is reassuring to note that the population of elderly patients in the present study exhibited  
47 similar mortality in comparison to the above mentioned thrombolysis trials. Patients in the  
48 current study were all treated with EMT, likely for one of two reasons: (1) failure of intravenous  
49  
50  
51  
52  
53  
54  
55  
56  
57  
58  
59  
60

Field Code Changed

Field Code Changed

Field Code Changed

Formatted: Not Highlight

11/21

1  
2  
3  
4  
5  
6  
7  
8  
9 rt-PA to clear a proximal large vessel occlusive lesion, or (2) the individual arrived to the  
10 hospital after a prolonged time lapse from symptom onset, thereby leaving EMT as the last line  
11 of therapy within the accepted time windows. Both of these indications represent a group of  
12 exceptionally disease burdened patients.

13  
14  
15  
16  
17  
18 The role of gender in stroke outcomes is not clearly defined. In agreement with our study,  
19 Saposnik et al.[12] reported on 12,262 AIS patients and noted the male sex to be a predictor of  
20 early mortality. Yet, Niewada et al.[13] reported the results of 17,370 AIS patients and  
21 documented that females had higher 14-day and 6-month mortality; while Adams et al.[14]  
22 collected data on 1,281 AIS patients and found no relationship between outcome and gender.  
23 Further research is warranted to investigate any gender-effects with regard to AIS patients, and  
24 specifically those undergoing EMT.

25  
26  
27  
28  
29  
30  
31  
32  
33 We anticipated increased expenses for the elderly with regard to their overall inpatient admission  
34 due to the larger number of chronic conditions, higher morbidity burden, and diminished  
35 efficiency of rehabilitation.[15,16] It was surprising to note no significant differences in the  
36 economic measures based on age. Although we must point out that our analysis does not reflect  
37 the true societal cost.[17-19] Long-term rehabilitation and care should be considered in future  
38 studies, but these measures were beyond the scope of the anonymized database used in this  
39 study.

40  
41  
42  
43  
44  
45  
46  
47  
48 The current study documented a significant increase in mortality for patients >80 years of age  
49 receiving EMT in comparison to their same age counterparts receiving only pharmacological  
50  
51  
52  
53  
54  
55  
56  
57  
58  
59  
60

Formatted: Font: Not Bold

12/21

1  
2  
3  
4  
5  
6  
7  
8  
9 ~~thrombolysis. This is in contrast to the findings of Willey et al. which concluded that intra-~~  
10 ~~arterial therapy does not raise the risk of in hospital mortality among those aged > 80 years~~  
11 ~~compared to treatment with intravenous thrombolysis alone.[7] Our study suggests an elevated~~  
12 ~~risk of mortality in patients of this age group receiving EMT.~~

Field Code Changed

13  
14  
15  
16  
17  
18 ~~Two possible reasons for this notable increase in mortality include: (1) older patients may~~  
19 ~~respond poorly after prolonged general anesthesia commonly used for EMT, which other~~  
20 ~~researchers have cited to influence mortality.[10,11] and (2) different disease states in each~~  
21 ~~population. Patients receiving EMT likely had a higher NIHSS from a more proximal large~~  
22 ~~vessel occlusive lesion refractory to medical management and pharmacological thrombolysis. Of~~  
23 ~~those not in the refractory group, it can be presumed that the individual may have arrived to the~~  
24 ~~hospital after a prolonged time lapse from symptom onset, thereby leaving EMT as the last line~~  
25 ~~of therapy within the accepted time windows.~~

Field Code Changed

26  
27  
28  
29  
30  
31  
32  
33  
34  
35 Due to limitations in the NIS we could not further investigate disease specifics in each  
36 population such as location/size of occlusion, collateral reperfusion, blood glucose level, and  
37 admission NIHSS score. ~~[20-22][12-14]~~ These variables are known to affect stroke outcome and  
38 the distribution within each population is unknown. While this is a limitation of the analysis, it is  
39 common to any large database study, and the benefits of large database examination include the  
40 ability to study medical practice at large without selection bias. An additional limitation is that  
41 the primary and secondary objectives ~~study outcomes~~ do not include any specific neurological or  
42 functional assessment, as these are not recorded in the NIS. ~~D~~~~The fact that a patient was~~  
43 ~~discharged to home was not considered as a primary objective as this variable~~ may be influenced

Field Code Changed

13/21

by the payor status and social factors, rather than a true assessment of independence and self-care. -Lastly, the data collected for NIS predates the arrival of stent-retriever devices, which may prove to be safer and more efficacious than previous generation devices.

## CONCLUSION

EMT for AIS patients older than 80 years of age resulted in significantly increased inpatient mortality ~~and reduced functional independence~~ in comparison to their younger counterparts. This is consistent with the overall worse prognosis seen in the natural history of this age group.

Studies to better identify patients ~~over 80 years of age~~ that would benefit from EMT may improve outcomes and reduce the gap currently observed in age stratifications. Ongoing endeavors to develop new revascularization devices may also improve AIS outcomes after EMT.



**Conflicts-of-interest/Disclosures:** MRV: none. AS: none. DJP: none. EMD is a physician consultant for MicroVention, Covidien Neurovascular, Integra LifeSciences Corporation, and McKesson Health Solutions.

**Contributor statement:** EMD and MV: study concept and design. MRV: acquisition of the data. MRV, AS, DJP, and EMD: analysis and interpretation of the data. MRV and EMD: drafting of the manuscript. AS and DJP: critical revision of the manuscript for important intellectual content. EMD: guarantor.

**Funding:** None

**Ethics approval:** This study used the Nationwide Inpatient Sample, a de-identified patient database. Therefore, this study did not require IRB review in accordance with the Code of Federal Regulations, 45 CFR 46.

**Data sharing statement:** Data were generated from the Nationwide Inpatient Sample, a publicly-available database. There is no additional data available.

## REFERENCES

- 1 [Broderick JP, Palesch YY, Demchuk AM, et al. Endovascular therapy after intravenous t-PA versus t-PA alone for stroke. \*N Engl J Med\* 2013;\*\*368\*\*:893–903. doi:10.1056/NEJMoa1214300](#)
- 2 [Ciccone A, Valvassori L, Nichelatti M, et al. Endovascular treatment for acute ischemic stroke. \*N Engl J Med\* 2013;\*\*368\*\*:904–13. doi:10.1056/NEJMoa1213701](#)
- 3 [Kidwell CS, Jahan R, Gornbein J, et al. A trial of imaging selection and endovascular treatment for ischemic stroke. \*N Engl J Med\* 2013;\*\*368\*\*:914–23. doi:10.1056/NEJMoa1212793](#)
- 4 [Office of the Actuary in the centers for Medicare and Medicaid services. NHE projections 2008-2018. Centers Medicare Medicaid Serv. <http://www.cms.hhs.gov/nationalhealthexpenddata/downloads/proj2008.pds> \(accessed 13 Feb2013\).](#)
- 5 [Vincent G, Velkoff V. The next four decades: the older population in the United States: 2010 to 2050 CPR. \*Us Census Bur\* 2010;;25–1138.](#)
- 6 [Kimball MM, Neal D, Waters MF, et al. Race and Income Disparity in Ischemic Stroke Care: Nationwide Inpatient Sample Database, 2002 to 2008. \*J Stroke Cerebrovasc Dis\* Published Online First: 17 July 2012. doi:10.1016/j.jstrokecerebrovasdis.2012.06.004](#)
- 7 [Elixhauser A, Steiner C, Harris DR, et al. Comorbidity measures for use with administrative data. \*Med Care\* 1998;\*\*36\*\*:8–27.](#)
- 8 [Vogel TR, Dombrovskiy VY, Haser PB, et al. Outcomes of carotid artery stenting and endarterectomy in the United States. \*J Vasc Surg\* 2009;\*\*49\*\*:325–330; discussion 330. doi:10.1016/j.jvs.2008.08.112](#)
- 9 [Willey JZ, Ortega-Gutierrez S, Petersen N, et al. Impact of acute ischemic stroke treatment in patients >80 years of age: the specialized program of translational research in acute stroke \(SPOTRIAS\) consortium experience. \*Stroke\* 2012;\*\*43\*\*:2369–75. doi:10.1161/STROKEAHA.112.660993](#)
- 10 [Di Carlo A, Lamassa M, Pracucci G, et al. Stroke in the very old: clinical presentation and determinants of 3-month functional outcome: A European perspective. European BIOMED Study of Stroke Care Group. \*Stroke\* 1999;\*\*30\*\*:2313–9.](#)
- 11 [Ford GA, Ahmed N, Azevedo E, et al. Intravenous alteplase for stroke in those older than 80 years old. \*Stroke\* 2010;\*\*41\*\*:2568–74. doi:10.1161/STROKEAHA.110.581884](#)
- 12 [Saposnik G, Kapral MK, Liu Y, et al. IScore: a risk score to predict death early after hospitalization for an acute ischemic stroke. \*Circulation\* 2011;\*\*123\*\*:739–49. doi:10.1161/CIRCULATIONAHA.110.983353](#)

Formatted: Bibliography, Widow/Orphan control, Adjust space between Latin and Asian text, Adjust space between Asian text and numbers

- 1  
2  
3  
4  
5  
6  
7  
8  
9 [13 Niewada M, Kobayashi A, Sandercock PAG, et al. Influence of gender on baseline features and clinical outcomes among 17,370 patients with confirmed ischaemic stroke in the international stroke trial. \*Neuroepidemiology\* 2005;\*\*24\*\*:123–8. doi:10.1159/000082999](#)
- 10  
11  
12 [14 Adams HP Jr, Davis PH, Leira EC, et al. Baseline NIH Stroke Scale score strongly predicts outcome after stroke: A report of the Trial of Org 10172 in Acute Stroke Treatment \(TOAST\). \*Neurology\* 1999;\*\*53\*\*:126–31.](#)
- 13  
14  
15 [15 Popa-Wagner A, Carmichael ST, Kokaia Z, et al. The response of the aged brain to stroke: too much, too soon? \*Curr Neurovasc Res\* 2007;\*\*4\*\*:216–27.](#)
- 16  
17  
18 [16 Alemayehu B, Warner KE. The Lifetime Distribution of Health Care Costs. \*Health Serv Res\* 2004;\*\*39\*\*:627–42. doi:10.1111/j.1475-6773.2004.00248.x](#)
- 19  
20  
21 [17 Dewey HM, Thrift AG, Mihalopoulos C, et al. Cost of stroke in Australia from a societal perspective: Results from the North East Melbourne Stroke Incidence Study \(NEMESIS\). \*Stroke\* 2001;\*\*32\*\*:2409–16.](#)
- 22  
23  
24 [18 Kolominsky-Rabas PL, Heuschmann PU, Marschall D, et al. Lifetime cost of ischemic stroke in Germany: Results and national projections from a population-based stroke registry - The Erlangen Stroke Project. \*Stroke\* 2006;\*\*37\*\*:1179–83. doi:10.1161/01.STR.0000217450.21310.90](#)
- 25  
26  
27 [19 Lee WC, Christensen MC, Joshi AV, et al. Long-term cost of stroke subtypes among medicare beneficiaries. \*Cerebrovasc Dis\* 2007;\*\*23\*\*:57–65. doi:10.1159/000096542](#)
- 28  
29  
30 [20 Costalat V, Lobotesis K, Machi P, et al. Prognostic factors related to clinical outcome following thrombectomy in ischemic stroke \(RECAST Study\). 50 patients prospective study. \*Eur J Radiol\* Published Online First: 30 August 2012. doi:10.1016/j.ejrad.2012.07.012](#)
- 31  
32  
33 [21 Ishkanian AA, McCullough-Hicks ME, Appelboom G, et al. Improving patient selection for endovascular treatment of acute cerebral ischemia: a review of the literature and an external validation of the Houston IAT and THRIVE predictive scoring systems. \*Neurosurg Focus\* 2011;\*\*30\*\*:E7. doi:10.3171/2011.3.FOCUS1144](#)
- 34  
35  
36 [22 Natarajan SK, Dandona P, Karmon Y, et al. Prediction of adverse outcomes by blood glucose level after endovascular therapy for acute ischemic stroke. \*J Neurosurg\* 2011;\*\*114\*\*:1785–99. doi:10.3171/2011.1.JNS10884](#)
- 37  
38  
39 ~~1 Broderick JP, Palesch YY, Demchuk AM, et al. Endovascular therapy after intravenous t PA versus t PA alone for stroke. *N Engl J Med* 2013;**368**:893–903. doi:10.1056/NEJMoa1214300~~
- 40  
41  
42 ~~2 Ciccone A, Valvassori L, Nichelatti M, et al. Endovascular treatment for acute ischemic stroke. *N Engl J Med* 2013;**368**:904–13. doi:10.1056/NEJMoa1213701~~
- 43  
44  
45  
46  
47  
48  
49  
50  
51  
52  
53  
54  
55  
56  
57  
58  
59  
60

- 3—Kidwell CS, Jahan R, Gornbein J, *et al.* A trial of imaging selection and endovascular treatment for ischemic stroke. *N Engl J Med* 2013;**368**:914–23. doi:10.1056/NEJMoa1212793
- 4—Office of the Actuary in the centers for Medicare and Medicaid services. NHE projections 2008–2018. Centers Medicare Medicaid Serv. <http://www.cms.hhs.gov/nationalhealthexpenddata/downloads/proj2008.pds> (accessed 13 Feb 2013).
- 5—Vincent G, Velkoff V. The next four decades: the older population in the United States: 2010 to 2050—CPR. *Us Census Bur* 2010;;25–1138.
- 6—Kimball MM, Neal D, Waters MF, *et al.* Race and Income Disparity in Ischemic Stroke Care: Nationwide Inpatient Sample Database, 2002 to 2008. *J Stroke Cerebrovasc Dis Off J Natl Stroke Assoc* Published Online First: 17 July 2012. doi:10.1016/j.jstrokecerebrovasdis.2012.06.004
- 7—Willey JZ, Ortega-Gutierrez S, Petersen N, *et al.* Impact of acute ischemic stroke treatment in patients >80 years of age: the specialized program of translational research in acute stroke (SPOTRIAS) consortium experience. *Stroke J Cereb Circ* 2012;**43**:2369–75. doi:10.1161/STROKEAHA.112.660993
- 8—Di Carlo A, Lamassa M, Pracucci G, *et al.* Stroke in the very old □: clinical presentation and determinants of 3-month functional outcome: A European perspective. European BIOMED Study of Stroke Care Group. *Stroke J Cereb Circ* 1999;**30**:2313–9.
- 9—Ford GA, Ahmed N, Azevedo E, *et al.* Intravenous alteplase for stroke in those older than 80 years old. *Stroke J Cereb Circ* 2010;**41**:2568–74. doi:10.1161/STROKEAHA.110.581884
- 10—Abou-Chebl A, Lin R, Hussain MS, *et al.* Conscious sedation versus general anesthesia during endovascular therapy for acute anterior circulation stroke: preliminary results from a retrospective, multicenter study. *Stroke J Cereb Circ* 2010;**41**:1175–9. doi:10.1161/STROKEAHA.109.574129
- 11—John N, Mitchell P, Dowling R, *et al.* Is general anaesthesia preferable to conscious sedation in the treatment of acute ischaemic stroke with intra-arterial mechanical thrombectomy? A review of the literature. *Neuroradiology* 2013;**55**:93–100. doi:10.1007/s00234-012-1084-y
- 12—Costalat V, Lobotesis K, Machi P, *et al.* Prognostic factors related to clinical outcome following thrombectomy in ischemic stroke (RECOSt Study): 50 patients prospective study. *Eur J Radiol* Published Online First: 30 August 2012. doi:10.1016/j.ejrad.2012.07.012
- 13—Ishkanian AA, McCullough Hicks ME, Appelboom G, *et al.* Improving patient selection for endovascular treatment of acute cerebral ischemia: a review of the literature and an external validation of the Houston IAT and THRIVE predictive scoring systems. *Neurosurg Focus* 2011;**30**:E7. doi:10.3171/2011.3.FOCUS1144

1  
2  
3  
4  
5  
6  
7  
8  
9  
10  
11  
12  
13  
14  
15  
16  
17  
18  
19  
20  
21  
22  
23  
24  
25  
26  
27  
28  
29  
30  
31  
32  
33  
34  
35  
36  
37  
38  
39  
40  
41  
42  
43  
44  
45  
46  
47  
48  
49  
50  
51  
52  
53  
54  
55  
56  
57  
58  
59  
60

18/21

14 Natarajan SK, Dandona P, Karmon Y, et al. Prediction of adverse outcomes by blood glucose level after endovascular therapy for acute ischemic stroke. *J Neurosurg* 2011;114:1785-99. doi:10.3171/2011.1.JNS10884

Formatted: Line spacing: single

For peer review only

19/21

**TABLES**

**Table 1.** Patient- and hospital-level characteristics of the population receiving mechanical thrombectomy for acute ischemic stroke compared between the elderly and their younger counterpart.

|                                              | ≤ 80 yrs<br>(n = 7614 cases)                                  | > 80 yrs<br>(n = 1686 cases)                              | P                    |
|----------------------------------------------|---------------------------------------------------------------|-----------------------------------------------------------|----------------------|
| Age                                          | 63 (53-73) <del>61.4 (14.0)</del>                             | 84 (82-87) <del>85.2 (4.0)</del>                          | <.001                |
| Gender, female                               | 46.9%                                                         | 66.7%                                                     | <.001                |
| Race, white                                  | 60.2%                                                         | 67.6%                                                     | .013                 |
| Median income level                          |                                                               |                                                           |                      |
| <\$39,000                                    | 26.7%                                                         | 23.5%                                                     |                      |
| \$39,000 to \$47,999                         | 24.8%                                                         | 25.6%                                                     |                      |
| \$48,000 to \$62,999                         | 23.6%                                                         | 23.5%                                                     | .607                 |
| ≥\$63,000                                    | 24.9%                                                         | 27.4%                                                     |                      |
| Payer, Medicare                              | 44.9%                                                         | 90.5%                                                     | <.001                |
| Number of chronic conditions                 | 7.1 (2.7)                                                     | 7.7 (2.7)                                                 | .001                 |
| Number of procedures                         | 6.9 (3.2)                                                     | 6.4 (2.7)                                                 | .012                 |
| Hlixhauser comorbidity score                 |                                                               |                                                           |                      |
| ≤ 2                                          | 37.2%                                                         | 30.6%                                                     |                      |
| 3                                            | 21.7%                                                         | 26.5%                                                     | <.001                |
| ≥ 4                                          | 41.1%                                                         | 42.9%                                                     |                      |
| APR-DRG severity of illness                  |                                                               |                                                           |                      |
| Mild                                         | 0%                                                            | 0%                                                        |                      |
| Moderate                                     | 1.5%                                                          | 0.6%                                                      | .418                 |
| Major                                        | 53.5%                                                         | 53.9%                                                     |                      |
| Extreme                                      | 45.0%                                                         | 45.5%                                                     |                      |
| Thrombolysis (intravenous or intra-arterial) | 55.5%                                                         | 63.1%                                                     | .013                 |
| Length of stay, days                         | 9 (5-14) <del>10.5 (10.2)</del>                               | 9 (6-13.6) <del>9.4 (7.8)</del>                           | .711 <del>.033</del> |
| Total charges, \$                            | 137,692 (95,139-<br>207,687) <del>169,763<br/>(125,050)</del> | 137,756 (87,582-<br>198,103) <del>156,361 (103,574)</del> | .021 <del>.040</del> |
| Discharged home                              | 12.7%                                                         | 2.1%                                                      | <.001                |
| Inpatient mortality                          | 21.6%                                                         | 33.7%                                                     | <.001                |
| Hospital owner                               |                                                               |                                                           |                      |
| Government, non-federal                      | 22.6%                                                         | 18.8%                                                     |                      |
| Private, non-profit                          | 69.2%                                                         | 74.6%                                                     | .150                 |
| Private, investor-own                        | 8.2%                                                          | 6.6%                                                      |                      |
| Teaching hospital                            | 84.2%                                                         | 80.6%                                                     | .122                 |

Formatted Table

Formatted Table

Formatted: Superscript

Formatted: Superscript

**Table 2.** The effect of mechanical thrombectomy on patients > 80 years versus their younger counterparts with regards to mortality, discharge disposition, hospital charges, and length of stay after accounting for patient and hospital confounding factors:

|                   | Effect Ratio | 95% CI      | P                      |
|-------------------|--------------|-------------|------------------------|
| Mortality*        | 2.107        | 1.549—2.866 | <.001                  |
| Discharged home*  |              |             | 0.297 0.131—0.673 .004 |
| Hospital charges‡ | 0.948        | 0.879—1.022 | .164                   |
| Length of stay ‡  | 0.948        | 0.845—1.063 | .360                   |

**Figure Legend:**

**Figure 1.** Multivariate analysis of inpatient mortality and economic measures. Inpatient mortality expressed as the odds ratio \*OR: odds for patient > 80 yrs/odds for patient ≤ 80 yrs along with the 95% confidence interval derived from binary logistic regression. Length of stay and charges are both expressed using the exponential parameter estimate along with the 95% confidence interval derived from generalized estimating equations. P-values are adjacent to the 95% confidence intervals. Points to the right of 1.0 reflect an increase in the odds/effect ratio relative to the indicated reference category. Points to the left of 1.0 reflect a decrease in the odds/effect ratio relative to the indicated reference category.

‡ Mean charge (\$) for patient > 80 yrs/mean charge for patient ≤ 80 yrs.

‡ Mean length (in days) for patient > 80 yrs/mean length for patient ≤ 80 yrs.

Formatted: Font: Bold

21/21

**Table 3.** The effect of mechanical thrombectomy compared to only thrombolysis in patients >80 years with regards to mortality, discharge disposition, hospital charges, and length of stay after accounting for patient and hospital confounding factors.

|                   | Effect Ratio | 95% CI      | P     |
|-------------------|--------------|-------------|-------|
| Mortality*        | 1.842        | 1.382—2.455 | <.001 |
| Discharged home*  | 0.394        | 0.179—0.866 | .020  |
| Hospital charges† | 1.733        | 1.603—1.876 | <.001 |
| Length of stay ‡  | 1.115        | 1.022—1.215 | .014  |

\* OR: odds for patient receiving mechanical thrombectomy/odds for patient receiving only thrombolysis.

† Mean charge (\$) for patient receiving mechanical thrombectomy/mean charge for patient receiving only thrombolysis.

‡ Mean length (in days) for patient receiving mechanical thrombectomy/mean length for patient receiving only thrombolysis.



1  
2  
3  
4  
5  
6  
7  
8  
9  
10  
11  
12  
13  
14  
15  
16  
17  
18  
19  
20  
21  
22  
23  
24  
25  
26  
27  
28  
29  
30  
31  
32  
33  
34  
35  
36  
37  
38  
39  
40  
41  
42  
43  
44  
45  
46  
47  
48  
49  
50  
51  
52  
53  
54  
55  
56  
57  
58  
59  
60

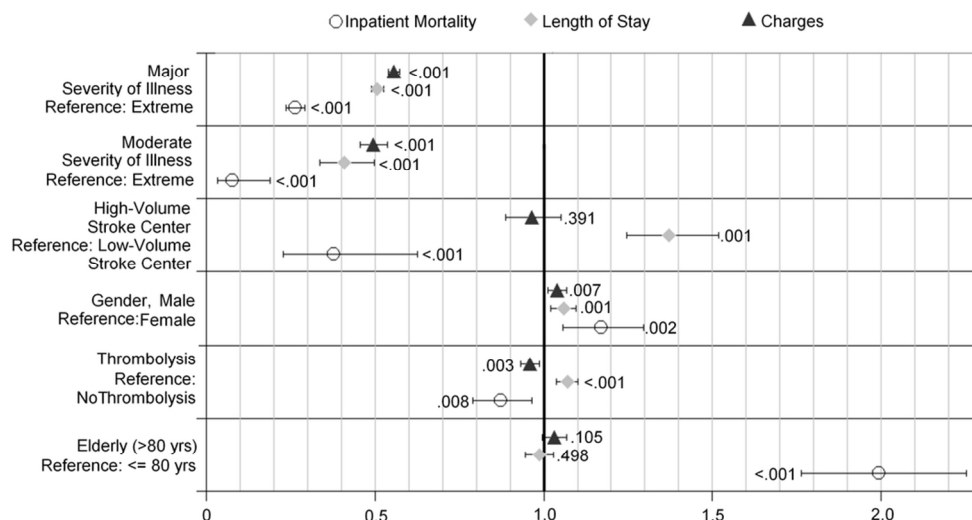

Multivariate analysis of inpatient mortality and economic measures. Inpatient mortality expressed as the odds ratio along with the 95% confidence interval derived from binary logistic regression. Length of stay and charges are both expressed using the exponential parameter estimate along with the 95% confidence interval derived from generalized estimating equations. P-values are adjacent to the 95% confidence intervals. Points to the right of 1.0 reflect an increase in the odds/effect ratio relative to the indicated reference category. Points to the left of 1.0 reflect a decrease in the odds/effect ratio relative to the indicated reference category.

92x52mm (300 x 300 DPI)



**Acute ischemic stroke outcomes following mechanical thrombectomy in the elderly versus their younger counterpart: a retrospective cohort study**

|                                 |                                                                                                                                                                                                                                                                 |
|---------------------------------|-----------------------------------------------------------------------------------------------------------------------------------------------------------------------------------------------------------------------------------------------------------------|
| Journal:                        | <i>BMJ Open</i>                                                                                                                                                                                                                                                 |
| Manuscript ID:                  | bmjopen-2013-004480.R2                                                                                                                                                                                                                                          |
| Article Type:                   | Research                                                                                                                                                                                                                                                        |
| Date Submitted by the Author:   | 17-Feb-2014                                                                                                                                                                                                                                                     |
| Complete List of Authors:       | Villwock, Mark; SUNY Upstate Medical University, Neurosurgery<br>Singla, Amit; SUNY Upstate Medical University, Neurosurgery<br>Padalino, David; SUNY Upstate Medical University, Neurosurgery<br>Deshaies, Eric; SUNY Upstate Medical University, Neurosurgery |
| <b>Primary Subject Heading</b>: | Cardiovascular medicine                                                                                                                                                                                                                                         |
| Secondary Subject Heading:      | Neurology, Emergency medicine, Surgery                                                                                                                                                                                                                          |
| Keywords:                       | Neurological injury < NEUROLOGY, Neurosurgery < SURGERY, VASCULAR SURGERY, HEALTH ECONOMICS, Stroke < NEUROLOGY, Neuroradiology < NEUROLOGY                                                                                                                     |
|                                 |                                                                                                                                                                                                                                                                 |

SCHOLARONE™  
Manuscripts

1  
2  
3  
4  
5  
6  
7  
8 Acute ischemic stroke outcomes following mechanical thrombectomy in the  
9 elderly versus their younger counterpart: a retrospective cohort study  
10  
11

12  
13  
14 Mark R. Villwock MS<sup>1</sup>, Amit Singla MD<sup>1</sup>, David J. Padalino MD<sup>1</sup>, Eric M. Deshaies, MD<sup>1\*</sup>  
15

16 <sup>1</sup>SUNY Upstate Medical University, Department of Neurosurgery, Syracuse, New York, USA  
17  
18

19  
20  
21 \*CORRESPONDING AUTHOR:  
22

23 Eric M. Deshaies, MD  
24

25 Director, SUNY Upstate Neurovascular Institute  
26

27 Director of Cerebrovascular, Endovascular, and Skull Base Neurosurgery  
28

29 Director, Neurosurgery Critical Care  
30

31 Associate Professor of Neurosurgery, Neuroscience and Physiology  
32

33 SUNY Upstate Medical University, Syracuse NY 13210 USA  
34

35 Phone: 1-315-464-5502  
36

37 Fax: 1-315-464-6373  
38

39 [DeshaieE@upstate.edu](mailto:DeshaieE@upstate.edu)  
40  
41  
42  
43  
44  
45  
46

47 Key words: endovascular therapy; stroke; thrombolysis; mechanical thrombectomy.  
48  
49

50  
51  
52 Word count: 1,774.  
53  
54  
55  
56  
57  
58  
59  
60

**ABSTRACT**

**Objectives:** Many physicians debate the efficacy of mechanical thrombectomy for ischemic stroke, but most agree that to establish potential benefit, patient selection must be examined further. People >80 years are a growing population of ischemic stroke patients but are largely excluded from clinical trials. The benefit of thrombectomy for them may be greatly reduced due to diminishing neuroplasticity and a larger number of medical co-morbidities. To address this knowledge gap, we examined clinical and economic outcomes after mechanical thrombectomy in the ischemic stroke population from the Nationwide Inpatient Sample. Our null hypotheses were that elderly patients (>80 years) would have a similar rate of inpatient mortality in comparison to their younger counterparts and incur a similar economic expense.

**Design:** Retrospective cohort study.

**Setting:** A 20-percent stratified sample of U.S. community hospitals within the Nationwide Inpatient Sample.

**Participants:** All patients from 2008-2010 with a primary diagnosis of ischemic stroke that received mechanical thrombectomy were included.

**Primary and secondary outcome measures:** The primary outcome was inpatient mortality. Secondary outcomes included hospital charges and length of stay.

**Results:** Less than 1% of all ischemic stroke cases (9,300) were treated with mechanical thrombectomy. Of these, 18% involved patients over 80 years of age. The odds of inpatient mortality in elderly patients treated with mechanical thrombectomy were approximately twice that of their younger counterparts (OR:1.993, P<.001). The elderly experienced no significant difference in hospital charges (P=.105) and length of stay (P=.498).

1  
2  
3 **Conclusions:** The odds of inpatient mortality after mechanical thrombectomy in patients over 80  
4  
5 years of age were twice that of their younger counterparts. This is consistent with the overall  
6  
7 worse prognosis seen in the natural history of this age group. Studies to better identify patients  
8  
9 that would benefit from EMT may improve outcomes and reduce the gap currently observed in  
10  
11 age stratifications.  
12  
13

### 14 15 16 17 **Strength and limitations of the study** 18

- 19  
20 • The strength of the study is the large number of included patients and the ability to study  
21  
22 medical practice at large without selection bias.  
23
- 24  
25 • Due to limitations in the database we could not control for disease specifics in each  
26  
27 population such as location/size of occlusion, collateral reperfusion, blood glucose level,  
28  
29 and admission NIHSS score.  
30
- 31  
32 • The time period of the study predated the arrival of stent-retriever devices, which may  
33  
34 prove to be safer and more efficacious than previous generation devices.  
35  
36  
37  
38  
39  
40  
41  
42  
43  
44  
45  
46  
47  
48  
49  
50  
51  
52  
53  
54  
55  
56  
57  
58  
59  
60

## INTRODUCTION

Controversy over the utility of endovascular mechanical thrombectomy (EMT) for acute ischemic stroke (AIS) has arisen since the Interventional Management of Stroke III trial (IMS III) was stopped in 2012 because of statistical futility.[1] Two additional trials, MR-RESCUE and SYNTHESIS Expansion, similarly failed to show any significant benefit with EMT for AIS.[1–3] Although individuals may disagree on the conclusions and debate the limitations of these trials, most agree that better selection criteria need to be established in order to identify potential subpopulations of patients who may benefit from EMT for AIS. Additionally, the cost-effectiveness of this intervention must be assessed and weighed in comparison to clinical outcomes. This is particularly important with the rise of health care costs in the USA, which at its current pace, is expected to reach one-fifth of the Gross Domestic Product by 2018.[4] Early debates of the Affordable Care Act centered on the creation of death panels to ration expenses. Although this panel was dismissed as myth, there remains a critical need to analyze the cost of newly-developed stroke interventions in an aging population that may not incur the same benefits as their younger peers due to lack of neuroplasticity and ongoing medical comorbidities.

The elderly population is expected to grow dramatically over the coming decades, specifically with the percentage of persons over 80 years of age doubling by 2050.[5] Given the growing percentage of elderly and their growing life expectancy, discussions regarding procedural risk versus clinical benefit will expand in importance, particularly with regards to costly interventions like EMT. The paucity of data on EMT, specifically in the elderly population, limits the

1  
2  
3 physician's ability to adequately counsel patients and their families regarding any potential  
4  
5 benefit from this emergent intervention.  
6  
7  
8  
9

10 To address this knowledge gap, we examined the elderly ischemic stroke population treated with  
11 EMT in a national database. Our null hypotheses were that elderly patients (> 80 years) would  
12 have a similar rate of inpatient mortality in comparison to their younger counterparts and incur a  
13 similar economic expense. The primary outcome was inpatient mortality. Secondary outcomes  
14 included hospital charges and length of stay.  
15  
16  
17  
18  
19  
20  
21  
22  
23  
24  
25  
26  
27  
28

## 29 **METHODS**

30 We analyzed discharge data from the Nationwide Inpatient Sample (NIS), Healthcare Cost and  
31 Utilization Project (HCUP), Agency for Healthcare Research and Quality (Rockville, MD). This  
32 database represents approximately a 20% stratified sample of U.S. community hospitals.  
33  
34  
35  
36  
37

38 Detailed information on the design of the NIS is available at <http://www.hcup-us.ahrq.gov>. We  
39 examined the prevalence of EMT for AIS using data published from NIS for 2008 through 2010.  
40  
41  
42  
43  
44  
45

46 Patients with AIS were identified in the NIS using the International Classification of Diseases,  
47 9<sup>th</sup> Revision, Clinical Modification (ICD-9-CM) codes (433.01, 433.11, 433.21, 433.31, 433.81,  
48 433.91, 434.01, 434.11, 434.91, and 437.1). Intervention utilizing EMT was identified using the  
49 ICD-9-CM procedure code 39.74, and pharmacological thrombolysis was documented with  
50 procedure code 99.10. Of note, there is no distinction in the ICD-9-CM code between intra-  
51  
52  
53  
54  
55  
56  
57  
58  
59  
60

1  
2  
3 arterial and intra-venous administration of thrombolytics. Additionally, a hospital was classified  
4 as “high volume” if its total discharge stroke volume exceeded 147 cases per year.[6] Total  
5 hospital charges from 2008 and 2009 were compounded yearly at an inflation rate of 3% to  
6 standardize the charges at 2010 levels. The length of hospital stay and associated hospital  
7 charges were calculated for all patients (including in-hospital deaths) and additionally for  
8 surviving patients. The second analysis was done to examine the economic measures without the  
9 artificial shortening of these variables that may occur in cases of comfort rather than curative  
10 care. The comorbidity burden of each patient was expressed as the sum of the Elixhauser  
11 comorbidity measures.[7,8]  
12  
13  
14  
15  
16  
17  
18  
19  
20  
21  
22  
23  
24  
25  
26

27 Data were analyzed using SPSS Version 17 (IBM Corporation, Armonk NY, USA). To obtain  
28 national estimates, discharge weights were applied. Univariate comparisons were performed  
29 using Mann-Whitney U-tests and Chi-squared tests, as appropriate.  
30  
31  
32  
33  
34  
35

36 Binary logistic regression was used to analyze the primary objective, inpatient mortality. The  
37 analysis considered the following factors known to affect stroke outcome: elderly age (>80 yrs),  
38 thrombolysis administration, presentation to a "high-volume" stroke center, gender, and All  
39 Patient Refined Diagnosis Related Group Severity of Illness (APR-DRG SOI). Backward  
40 stepwise regression was performed with variable entry when probability was less than 0.05 and  
41 removal when probability exceeded 0.10. Odds ratios and their 95% confidence intervals were  
42 reported.  
43  
44  
45  
46  
47  
48  
49  
50  
51  
52  
53  
54  
55  
56  
57  
58  
59  
60



1  
2  
3 Generalized linear models with a gamma distribution and log link function were used to analyze  
4 the economic measures. The exponential parameter estimates were reported along with their 95%  
5 confidence intervals. The exponential parameter estimates are equivalent to the ratio of the  
6 estimated marginal means with the denominator being the reference category. A probability  
7 value of .01 was considered statistically significant in order to nominally control for Type I error.  
8  
9  
10  
11  
12  
13  
14

## 15 16 17 **RESULTS**

18  
19 Nationally, there were 1,674,200 acute ischemic stroke cases during the years 2008 through  
20 2010, 9,300 (< 1%) of which received EMT. Overall inpatient mortality for acute ischemic  
21 stroke was 7.9%. This rate increased to 23.8% when considering only patients receiving  
22 intervention with EMT. Patients greater than 80 yrs of age receiving EMT had an inpatient  
23 mortality rate of 33.7%, significantly exceeding the rate for their younger counterpart that was  
24 found to be 21.6% ( $P < .001$ ) (Table 1). In comparison to younger patients, the patient over 80  
25 was more likely to be a white female on Medicare, to have received pharmacological  
26 thrombolysis, and to not be discharged home (Table 1). Interestingly, no patients, young or  
27 elderly, treated at low-volume stroke centers were discharged home (0/70). This is opposed to  
28 10.8% of patients admitted to high-volume stroke centers ( $P=.004$ ).  
29  
30  
31  
32  
33  
34  
35  
36  
37  
38  
39  
40  
41  
42  
43  
44  
45

46 Multivariate analysis was performed to examine the primary and secondary outcome measures  
47 (Figure 1). The odds for inpatient mortality in the elderly treated with EMT were approximately  
48 double in comparison to their younger counterpart (OR 1.993, 95% CI: 1.763-2.254,  $P<.001$ ).  
49 The factors noted to significantly ( $P<.01$ ) reduce mortality were presentation to a high-volume  
50 stroke center (OR=0.378), thrombolysis administration (OR=0.873), female gender (0.855), and  
51  
52  
53  
54  
55  
56  
57  
58  
59  
60

1  
2  
3 decreased severity of illness (Figure 1). There was no significant difference in hospital charges  
4 and length of stay for the elderly (Figure 1). The economic measures were most influenced by  
5 severity of illness (Figure 1).  
6  
7  
8  
9

## 10 11 12 **DISCUSSION**

13  
14  
15 The paucity of data on EMT in the elderly impedes the ability of physicians and patients to make  
16 informed decisions. As this segment of the population is forecasted to dramatically increase,  
17 additional information on the risk versus benefit of intervention will facilitate physician-patient  
18 discussions.  
19  
20  
21  
22  
23

24  
25  
26  
27 This study quantifies clinical and economic outcomes following EMT for AIS in patients older  
28 than 80 years of age across the US. The higher mortality in patients aged over 80 years is in  
29 agreement with the overall worse prognosis seen in the natural history of this age group. For  
30 example, the Specialized Program of Translational Research in Acute Stroke (SPOTRIAS)  
31 examined patients  $\geq 80$  years of age that received intravenous rt-PA and/or intra-arterial  
32 therapy.[9] The database contained more than 1100 patients aged 80 years and greater. It  
33 documented a higher risk of in-hospital mortality for the elder stroke patient (OR: 2.13), but no  
34 difference in mortality rates between intervention modalities. Similarly, data from the European  
35 BIOMED Study of Stroke Care Group and the Safe Implementation of Thrombolysis in Stroke-  
36 Monitoring Study (SITS-MOST) registry reported outcomes from AIS patients aged  $> 80$  years,  
37 and documented higher mortality and worse functional outcomes.[10,11] Specifically, the SITS-  
38 MOST registry documented an increase in mortality by 18% for patients  $> 80$  years, and a 22%  
39 reduction in independence.[11]  
40  
41  
42  
43  
44  
45  
46  
47  
48  
49  
50  
51  
52  
53  
54  
55  
56  
57  
58  
59  
60

1  
2  
3  
4  
5  
6 It is reassuring to note that the population of elderly patients in the present study exhibited  
7  
8 similar mortality in comparison to the above mentioned thrombolysis trials. Patients in the  
9  
10 current study were all treated with EMT, likely for one of two reasons: (1) failure of intravenous  
11  
12 rt-PA to clear a proximal large vessel occlusive lesion, or (2) the individual arrived to the  
13  
14 hospital after a prolonged time lapse from symptom onset, thereby leaving EMT as the last line  
15  
16 of therapy within the accepted time windows. Both of these indications represent a group of  
17  
18 exceptionally disease burdened patients.  
19  
20  
21  
22  
23

24  
25 The role of gender in stroke outcomes is not clearly defined. In agreement with our study,  
26  
27 Saposnik et al.[12] reported on 12,262 AIS patients and noted the male sex to be a predictor of  
28  
29 early mortality. Yet, Niewada et al.[13] reported the results of 17,370 AIS patients and  
30  
31 documented that females had higher 14-day and 6-month mortality; while Adams et al.[14]  
32  
33 collected data on 1,281 AIS patients and found no relationship between outcome and gender.  
34  
35 Further research is warranted to investigate any gender-effects with regard to AIS patients, and  
36  
37 specifically those undergoing EMT.  
38  
39  
40  
41  
42

43  
44 We anticipated increased expenses for the elderly with regard to their overall inpatient admission  
45  
46 due to the larger number of chronic conditions, higher morbidity burden, and diminished  
47  
48 efficiency of rehabilitation.[15,16] It was surprising to note no significant differences in the  
49  
50 economic measures based on age for survivors. If deaths were included, the length-of-stay and  
51  
52 hospital charges were reduced in the elderly population. We believe largely due to increased  
53  
54 utilization of comfort rather than curative measures in the elderly population as evident by their  
55  
56  
57  
58  
59  
60

1  
2  
3 increased rate of in-hospital mortality. Additionally, we must point out that our analysis does not  
4  
5 reflect the true societal cost.[17–19] Long-term rehabilitation and care should be considered in  
6  
7 future studies, but these measures were beyond the scope of the anonymized database used in  
8  
9 this study.  
10  
11

12  
13  
14  
15 Due to limitations in the NIS we could not further investigate disease specifics in each  
16  
17 population such as location/size of occlusion, collateral reperfusion, blood glucose level, and  
18  
19 admission NIHSS score.[20–22] These variables are known to affect stroke outcome and the  
20  
21 distribution within each population is unknown. While this is a limitation of the analysis, it is  
22  
23 common to any large database study, and the benefits of large database examination include the  
24  
25 ability to study medical practice at large without selection bias. An additional limitation is that  
26  
27 the primary and secondary objectives do not include any specific neurological or functional  
28  
29 assessment, as these are not recorded in the NIS. Discharge to home was not considered as a  
30  
31 primary objective as this variable may be influenced by the payor status and social factors, rather  
32  
33 than a true assessment of independence and self-care. Lastly, the data collected for NIS predates  
34  
35 the arrival of stent-retriever devices, which may prove to be safer and more efficacious than  
36  
37 previous generation devices.  
38  
39  
40  
41  
42  
43  
44

## 45 46 **CONCLUSION**

47  
48 EMT for AIS patients older than 80 years of age resulted in significantly increased inpatient  
49  
50 mortality in comparison to their younger counterparts. This is consistent with the overall worse  
51  
52 prognosis seen in the natural history of this age group. Studies to better identify patients that  
53  
54 would benefit from EMT may improve outcomes and reduce the gap currently observed in age  
55  
56  
57  
58  
59  
60

1  
2  
3  
4  
5  
6  
7  
8  
9  
10  
11  
12  
13  
14  
15  
16  
17  
18  
19  
20  
21  
22  
23  
24  
25  
26  
27  
28  
29  
30  
31  
32  
33  
34  
35  
36  
37  
38  
39  
40  
41  
42  
43  
44  
45  
46  
47  
48  
49  
50  
51  
52  
53  
54  
55  
56  
57  
58  
59  
60

stratifications. Ongoing endeavors to develop new revascularization devices may also improve  
AIS outcomes after EMT.

For peer review only

1  
2  
3 **Contributor statement:** EMD and MV: study concept and design. MRV: acquisition of the  
4 data. MRV, AS, DJP, and EMD: analysis and interpretation of the data. MRV and EMD: drafting  
5 of the manuscript. AS and DJP: critical revision of the manuscript for important intellectual  
6 content. EMD: guarantor.  
7  
8  
9

10  
11  
12 **Funding:** None

13  
14  
15 **Ethics approval:** This study used the Nationwide Inpatient Sample, a de-identified patient  
16 database. Therefore, this study did not require IRB review in accordance with the Code of  
17 Federal Regulations, 45 CFR 46.  
18  
19

20  
21  
22 **Conflicts-of-interest/Disclosures:** MRV: none. AS: none. DJP: none. EMD is a physician  
23 consultant for MicroVention, Covidien Neurovascular, Integra LifeSciences Corporation, and  
24 McKesson Health Solutions.  
25  
26  
27

28  
29  
30 **Data sharing statement:** Data were generated from the Nationwide Inpatient Sample, a  
31 publicly-available database. There is no additional data available.  
32  
33  
34  
35  
36  
37  
38  
39  
40  
41  
42  
43  
44  
45  
46  
47  
48  
49  
50  
51  
52  
53  
54  
55  
56  
57  
58  
59  
60

## REFERENCES

- 1 Broderick JP, Palesch YY, Demchuk AM, *et al.* Endovascular therapy after intravenous t-PA versus t-PA alone for stroke. *N Engl J Med* 2013;**368**:893–903. doi:10.1056/NEJMoa1214300
- 2 Ciccone A, Valvassori L, Nichelatti M, *et al.* Endovascular treatment for acute ischemic stroke. *N Engl J Med* 2013;**368**:904–13. doi:10.1056/NEJMoa1213701
- 3 Kidwell CS, Jahan R, Gornbein J, *et al.* A trial of imaging selection and endovascular treatment for ischemic stroke. *N Engl J Med* 2013;**368**:914–23. doi:10.1056/NEJMoa1212793
- 4 Office of the Actuary in the centers for Medicare and Medicaid services. NHE projections 2008-2018. Centers Medicare Medicaid Serv. <http://www.cms.hhs.gov/nationalhealthexpenddata/downloads/proj2008.pds> (accessed 13 Feb2013).
- 5 Vincent G, Velkoff V. The next four decades: the older population in the United States: 2010 to 2050 CPR. *Us Census Bur* 2010;;25–1138.
- 6 Kimball MM, Neal D, Waters MF, *et al.* Race and Income Disparity in Ischemic Stroke Care: Nationwide Inpatient Sample Database, 2002 to 2008. *J Stroke Cerebrovasc Dis* Published Online First: 17 July 2012. doi:10.1016/j.jstrokecerebrovasdis.2012.06.004
- 7 Elixhauser A, Steiner C, Harris DR, *et al.* Comorbidity measures for use with administrative data. *Med Care* 1998;**36**:8–27.
- 8 Vogel TR, Dombrovskiy VY, Haser PB, *et al.* Outcomes of carotid artery stenting and endarterectomy in the United States. *J Vasc Surg* 2009;**49**:325–330; discussion 330. doi:10.1016/j.jvs.2008.08.112
- 9 Willey JZ, Ortega-Gutierrez S, Petersen N, *et al.* Impact of acute ischemic stroke treatment in patients >80 years of age: the specialized program of translational research in acute stroke (SPOTRIAS) consortium experience. *Stroke* 2012;**43**:2369–75. doi:10.1161/STROKEAHA.112.660993
- 10 Di Carlo A, Lamassa M, Pracucci G, *et al.* Stroke in the very old: clinical presentation and determinants of 3-month functional outcome: A European perspective. European BIOMED Study of Stroke Care Group. *Stroke* 1999;**30**:2313–9.
- 11 Ford GA, Ahmed N, Azevedo E, *et al.* Intravenous alteplase for stroke in those older than 80 years old. *Stroke* 2010;**41**:2568–74. doi:10.1161/STROKEAHA.110.581884
- 12 Saposnik G, Kapral MK, Liu Y, *et al.* IScore: a risk score to predict death early after hospitalization for an acute ischemic stroke. *Circulation* 2011;**123**:739–49. doi:10.1161/CIRCULATIONAHA.110.983353

- 1  
2  
3  
4  
5  
6  
7  
8  
9  
10  
11  
12  
13  
14  
15  
16  
17  
18  
19  
20  
21  
22  
23  
24  
25  
26  
27  
28  
29  
30  
31  
32  
33  
34  
35  
36  
37  
38  
39  
40  
41  
42  
43  
44  
45  
46  
47  
48  
49  
50  
51  
52  
53  
54  
55  
56  
57  
58  
59  
60
- 13 Niewada M, Kobayashi A, Sandercock PAG, *et al.* Influence of gender on baseline features and clinical outcomes among 17,370 patients with confirmed ischaemic stroke in the international stroke trial. *Neuroepidemiology* 2005;**24**:123–8. doi:10.1159/000082999
  - 14 Adams HP Jr, Davis PH, Leira EC, *et al.* Baseline NIH Stroke Scale score strongly predicts outcome after stroke: A report of the Trial of Org 10172 in Acute Stroke Treatment (TOAST). *Neurology* 1999;**53**:126–31.
  - 15 Popa-Wagner A, Carmichael ST, Kokaia Z, *et al.* The response of the aged brain to stroke: too much, too soon? *Curr Neurovasc Res* 2007;**4**:216–27.
  - 16 Alemayehu B, Warner KE. The Lifetime Distribution of Health Care Costs. *Health Serv Res* 2004;**39**:627–42. doi:10.1111/j.1475-6773.2004.00248.x
  - 17 Dewey HM, Thrift AG, Mihalopoulos C, *et al.* Cost of stroke in Australia from a societal perspective: Results from the North East Melbourne Stroke Incidence Study (NEMESIS). *Stroke* 2001;**32**:2409–16.
  - 18 Kolominsky-Rabas PL, Heuschmann PU, Marschall D, *et al.* Lifetime cost of ischemic stroke in Germany: Results and national projections from a population-based stroke registry - The Erlangen Stroke Project. *Stroke* 2006;**37**:1179–83. doi:10.1161/01.STR.0000217450.21310.90
  - 19 Lee WC, Christensen MC, Joshi AV, *et al.* Long-term cost of stroke subtypes among medicare beneficiaries. *Cerebrovasc Dis* 2007;**23**:57–65. doi:10.1159/000096542
  - 20 Costalat V, Lobotesis K, Machi P, *et al.* Prognostic factors related to clinical outcome following thrombectomy in ischemic stroke (RECAST Study). 50 patients prospective study. *Eur J Radiol* Published Online First: 30 August 2012. doi:10.1016/j.ejrad.2012.07.012
  - 21 Ishkanian AA, McCullough-Hicks ME, *et al.* Improving patient selection for endovascular treatment of acute cerebral ischemia: a review of the literature and an external validation of the Houston IAT and THRIVE predictive scoring systems. *Neurosurg Focus* 2011;**30**:E7. doi:10.3171/2011.3.FOCUS1144
  - 22 Natarajan SK, Dandona P, Karmon Y, *et al.* Prediction of adverse outcomes by blood glucose level after endovascular therapy for acute ischemic stroke. *J Neurosurg* 2011;**114**:1785–99. doi:10.3171/2011.1.JNS10884



**Table 1.** Patient- and hospital-level characteristics of the population receiving mechanical thrombectomy for acute ischemic stroke compared between the elderly and their younger counterpart.

|                                                                                                        | ≤ 80 yrs<br>(n = 7614 cases) | > 80 yrs<br>(n = 1686 cases) | <i>P</i> |
|--------------------------------------------------------------------------------------------------------|------------------------------|------------------------------|----------|
| Age                                                                                                    | 63 (53-73)                   | 84 (82-87)                   |          |
| Gender, female                                                                                         | 46.9%                        | 66.7%                        | <.001    |
| Race, white                                                                                            | 60.2%                        | 67.6%                        | .013     |
| Median income level                                                                                    |                              |                              |          |
| <\$39,000                                                                                              | 26.7%                        | 23.5%                        |          |
| \$39,000 to \$47,999                                                                                   | 24.8%                        | 25.6%                        |          |
| \$48,000 to \$62,999                                                                                   | 23.6%                        | 23.5%                        | .607     |
| ≥\$63,000                                                                                              | 24.9%                        | 27.4%                        |          |
| Payer, Medicare                                                                                        | 44.9%                        | 90.5%                        | <.001    |
| Elixhauser comorbidity score                                                                           |                              |                              |          |
| ≤ 2                                                                                                    | 37.2%                        | 30.6%                        |          |
| 3                                                                                                      | 21.7%                        | 26.5%                        | <.001    |
| ≥ 4                                                                                                    | 41.1%                        | 42.9%                        |          |
| APR-DRG severity of illness                                                                            |                              |                              |          |
| Mild                                                                                                   | 0%                           | 0%                           |          |
| Moderate                                                                                               | 1.5%                         | 0.6%                         |          |
| Major                                                                                                  | 53.5%                        | 53.9%                        | .418     |
| Extreme                                                                                                | 45.0%                        | 45.5%                        |          |
| Thrombolysis (intravenous or intra-arterial)                                                           | 55.5%                        | 63.1%                        | .013     |
| Length of stay, days (survivors)                                                                       | 9 (5-14)                     | 9 (6-13.6)                   | .711     |
| Length of stay, days (all patients)                                                                    | 8 (4-13)                     | 8 (4-12)                     | .004     |
| Total charges, \$ (survivors)                                                                          | 137,692 (95,139-207,687)     | 137,756 (87,582-198,103)     | .021     |
| Total charges, \$ (all patients)                                                                       | 132,828 (90,661-205,835)     | 126,238 (86,230-188,294)     | <.001    |
| Discharged home                                                                                        | 12.7%                        | 2.1%                         | <.001    |
| Inpatient mortality                                                                                    | 21.6%                        | 33.7%                        | <.001    |
| Hospital owner                                                                                         |                              |                              |          |
| Government, non-federal                                                                                | 22.6%                        | 18.8%                        |          |
| Private, non-profit                                                                                    | 69.2%                        | 74.6%                        | .150     |
| Private, investor-own                                                                                  | 8.2%                         | 6.6%                         |          |
| Teaching hospital                                                                                      | 84.2%                        | 80.6%                        | .122     |
| Continuous variables expressed as: median (25 <sup>th</sup> percentile – 75 <sup>th</sup> percentile). |                              |                              |          |

**Figure Legend:**

**Figure 1.** Multivariate analysis of inpatient mortality and economic measures for survivors. Inpatient mortality expressed as the odds ratio along with the 95% confidence interval derived from binary logistic regression. Length of stay and charges are both expressed using the exponential parameter estimate along with the 95% confidence interval derived from generalized estimating equations. P-values are adjacent to the 95% confidence intervals. Points to the right of 1.0 reflect an increase in the odds/effect ratio relative to the indicated reference category. Points to the left of 1.0 reflect a decrease in the odds/effect ratio relative to the indicated reference category.

1  
2  
3  
4  
5  
6  
7  
8 Acute ischemic stroke outcomes following mechanical thrombectomy in the  
9 elderly versus their younger counterpart: a retrospective cohort study  
10  
11

12  
13  
14 Mark R. Villwock MS<sup>1</sup>, Amit Singla MD<sup>1</sup>, David J. Padalino MD<sup>1</sup>, Eric M. Deshaies, MD<sup>1\*</sup>  
15

16 <sup>1</sup>SUNY Upstate Medical University, Department of Neurosurgery, Syracuse, New York, USA  
17  
18

19  
20  
21 \*CORRESPONDING AUTHOR:  
22

23 Eric M. Deshaies, MD  
24

25 Director, SUNY Upstate Neurovascular Institute  
26

27 Director of Cerebrovascular, Endovascular, and Skull Base Neurosurgery  
28

29 Director, Neurosurgery Critical Care  
30

31 Associate Professor of Neurosurgery, Neuroscience and Physiology  
32

33 SUNY Upstate Medical University, Syracuse NY 13210 USA  
34

35 Phone: 1-315-464-5502  
36

37 Fax: 1-315-464-6373  
38

39 [DeshaieE@upstate.edu](mailto:DeshaieE@upstate.edu)  
40  
41  
42  
43  
44  
45  
46

47 Key words: endovascular therapy; stroke; thrombolysis; mechanical thrombectomy.  
48  
49

50  
51  
52 Word count: 1,774.  
53  
54  
55  
56  
57  
58  
59  
60

## ABSTRACT

**Objectives:** Many physicians debate the efficacy of mechanical thrombectomy for ischemic stroke, but most agree that to establish potential benefit, patient selection must be examined further. People >80 years are a growing population of ischemic stroke patients but are largely excluded from clinical trials. The benefit of thrombectomy for them may be greatly reduced due to diminishing neuroplasticity and a larger number of medical co-morbidities. To address this knowledge gap, we examined clinical and economic outcomes after mechanical thrombectomy in the ischemic stroke population from the Nationwide Inpatient Sample. Our null hypotheses were that elderly patients (>80 years) would have a similar rate of inpatient mortality in comparison to their younger counterparts and incur a similar economic expense.

**Design:** Retrospective cohort study.

**Setting:** A 20-percent stratified sample of U.S. community hospitals within the Nationwide Inpatient Sample.

**Participants:** All patients from 2008-2010 with a primary diagnosis of ischemic stroke that received mechanical thrombectomy were included.

**Primary and secondary outcome measures:** The primary outcome was inpatient mortality. Secondary outcomes included hospital charges and length of stay.

**Results:** Less than 1% of all ischemic stroke cases (9,300) were treated with mechanical thrombectomy. Of these, 18% involved patients over 80 years of age. The odds of inpatient mortality in elderly patients treated with mechanical thrombectomy were approximately twice that of their younger counterparts (OR:1.993, P<.001). The elderly experienced no significant difference in hospital charges (P=.105) and length of stay (P=.498).

1  
2  
3 **Conclusions:** The odds of inpatient mortality after mechanical thrombectomy in patients over 80  
4  
5 years of age were twice that of their younger counterparts. This is consistent with the overall  
6  
7 worse prognosis seen in the natural history of this age group. Studies to better identify patients  
8  
9 that would benefit from EMT may improve outcomes and reduce the gap currently observed in  
10  
11 age stratifications.  
12  
13

### 14 15 16 17 **Strength and limitations of the study**

- 18 • The strength of the study is the large number of included patients and the ability to study  
19  
20 medical practice at large without selection bias.  
21  
22
- 23 • Due to limitations in the database we could not control for disease specifics in each  
24  
25 population such as location/size of occlusion, collateral reperfusion, blood glucose level,  
26  
27 and admission NIHSS score.  
28  
29
- 30 • The time period of the study predated the arrival of stent-retriever devices, which may  
31  
32 prove to be safer and more efficacious than previous generation devices.  
33  
34  
35  
36  
37  
38

### 39 **INTRODUCTION**

40  
41 Controversy over the utility of endovascular mechanical thrombectomy (EMT) for acute  
42  
43 ischemic stroke (AIS) has arisen since the Interventional Management of Stroke III trial (IMS  
44  
45 III) was stopped in 2012 because of statistical futility.[1] Two additional trials, MR-RESCUE  
46  
47 and SYNTHESIS Expansion, similarly failed to show any significant benefit with EMT for  
48  
49 AIS.[1–3] Although individuals may disagree on the conclusions and debate the limitations of  
50  
51 these trials, most agree that better selection criteria need to be established in order to identify  
52  
53 potential subpopulations of patients who may benefit from EMT for AIS. Additionally, the cost-  
54  
55  
56  
57  
58  
59  
60

1  
2  
3 effectiveness of this intervention must be assessed and weighed in comparison to clinical  
4  
5 outcomes. This is particularly important with the rise of health care costs in the USA, which at  
6  
7 its current pace, is expected to reach one-fifth of the Gross Domestic Product by 2018.[4] Early  
8  
9 debates of the Affordable Care Act centered on the creation of death panels to ration expenses.  
10  
11 Although this panel was dismissed as myth, there remains a critical need to analyze the cost of  
12  
13 newly-developed stroke interventions in an aging population that may not incur the same  
14  
15 benefits as their younger peers due to lack of neuroplasticity and ongoing medical co-  
16  
17 morbidities.  
18  
19  
20  
21

22  
23  
24 The elderly population is expected to grow dramatically over the coming decades, specifically  
25  
26 with the percentage of persons over 80 years of age doubling by 2050.[5] Given the growing  
27  
28 percentage of elderly and their growing life expectancy, discussions regarding procedural risk  
29  
30 versus clinical benefit will expand in importance, particularly with regards to costly interventions  
31  
32 like EMT. The paucity of data on EMT, specifically in the elderly population, limits the  
33  
34 physician's ability to adequately counsel patients and their families regarding any potential  
35  
36 benefit from this emergent intervention.  
37  
38  
39  
40

41  
42  
43 To address this knowledge gap, we examined the elderly ischemic stroke population treated with  
44  
45 EMT in a national database. Our null hypotheses were that elderly patients (> 80 years) would  
46  
47 have a similar rate of inpatient mortality in comparison to their younger counterparts and incur a  
48  
49 similar economic expense. The primary outcome was inpatient mortality. Secondary outcomes  
50  
51 included hospital charges and length of stay.  
52  
53  
54  
55  
56  
57  
58  
59  
60

## METHODS

We analyzed discharge data from the Nationwide Inpatient Sample (NIS), Healthcare Cost and Utilization Project (HCUP), Agency for Healthcare Research and Quality (Rockville, MD). This database represents approximately a 20% stratified sample of U.S. community hospitals.

Detailed information on the design of the NIS is available at <http://www.hcup-us.ahrq.gov>. We examined the prevalence of EMT for AIS using data published from NIS for 2008 through 2010.

Patients with AIS were identified in the NIS using the International Classification of Diseases, 9<sup>th</sup> Revision, Clinical Modification (ICD-9-CM) codes (433.01, 433.11, 433.21, 433.31, 433.81, 433.91, 434.01, 434.11, 434.91, and 437.1). Intervention utilizing EMT was identified using the ICD-9-CM procedure code 39.74, and pharmacological thrombolysis was documented with procedure code 99.10. Of note, there is no distinction in the ICD-9-CM code between intra-arterial and intra-venous administration of thrombolytics. Additionally, a hospital was classified as “high volume” if its total discharge stroke volume exceeded 147 cases per year.[6] Total hospital charges from 2008 and 2009 were compounded yearly at an inflation rate of 3% to standardize the charges at 2010 levels. The length of hospital stay and associated hospital charges were ~~only~~ calculated for all patients (including in-hospital deaths) and additionally for surviving patients ~~who did not die during their hospital course~~. The second analysis is ~~is~~ was done to examine the economic measures without ~~eliminate~~ the artificial shortening of these variables that may occur in cases of comfort rather than curative care ~~in cases involving a withdrawal of~~

1  
2  
3 | ~~care~~. The comorbidity burden of each patient was expressed as the sum of the Elixhauser  
4  
5  
6 comorbidity measures.[7,8]  
7  
8  
9

10 Data were analyzed using SPSS Version 17 (IBM Corporation, Armonk NY, USA). To obtain  
11  
12 national estimates, discharge weights were applied. Univariate comparisons were performed  
13  
14 using Mann-Whitney U-tests and Chi-squared tests, as appropriate.  
15  
16  
17  
18  
19

20 Binary logistic regression was used to analyze the primary objective, inpatient mortality. The  
21  
22 analysis considered the following factors known to affect stroke outcome: elderly age (>80 yrs),  
23  
24 thrombolysis administration, presentation to a "high-volume" stroke center, gender, and All  
25  
26 Patient Refined Diagnosis Related Group Severity of Illness (APR-DRG SOI). Backward  
27  
28 stepwise regression was performed with variable entry when probability was less than 0.05 and  
29  
30 removal when probability exceeded 0.10. Odds ratios and their 95% confidence intervals were  
31  
32 reported.  
33  
34  
35  
36  
37  
38

39 | Generalized linear models with ~~ta gamma distribution and log link function~~ ~~he use of generalized~~  
40  
41 ~~estimated equations~~ were used to analyze the economic measures. ~~To meet the distributional~~  
42  
43 ~~requirements of a generalized linear model, we used the logarithm of length of hospital stay and~~  
44  
45 ~~the logarithm of total inflation-adjusted charges as targeted outcomes in analyses.~~ The  
46  
47 exponential parameter estimates were reported along with their 95% confidence intervals. The  
48  
49 exponential parameter estimates are equivalent to the ratio of the estimated marginal means with  
50  
51 the denominator being the reference category. A probability value of .01 was considered  
52  
53  
54 statistically significant in order to nominally control for Type I error.  
55  
56  
57  
58  
59  
60



## RESULTS

Nationally, there were 1,674,200 acute ischemic stroke cases during the years 2008 through 2010, 9,300 (< 1%) of which received EMT. Overall inpatient mortality for acute ischemic stroke was 7.9%. This rate increased to 23.8% when considering only patients receiving intervention with EMT. Patients greater than 80 yrs of age receiving EMT had an inpatient mortality rate of 33.7%, significantly exceeding the rate for their younger counterpart that was found to be 21.6% ( $P < .001$ ) (Table 1). In comparison to younger patients, the patient over 80 was more likely to be a white female on Medicare, to have received pharmacological thrombolysis, and to not be discharged home (Table 1). Interestingly, no patients, young or elderly, treated at low-volume stroke centers were discharged home (0/70). This is opposed to 10.8% of patients admitted to high-volume stroke centers ( $P=.004$ ).

Multivariate analysis was performed to examine the primary and secondary outcome measures (Figure 1). The odds for inpatient mortality in the elderly treated with EMT were approximately double in comparison to their younger counterpart (OR 1.993, 95% CI: 1.763-2.254,  $P<.001$ ). The factors noted to significantly ( $P<.01$ ) reduce mortality were presentation to a high-volume stroke center (OR=0.378), thrombolysis administration (OR=0.873), female gender (0.855), and decreased severity of illness (Figure 1). There was no significant difference in hospital charges and length of stay for the elderly (Figure 1). The economic measures were most influenced by severity of illness (Figure 1).

## DISCUSSION

1  
2  
3 The paucity of data on EMT in the elderly impedes the ability of physicians and patients to make  
4 informed decisions. As this segment of the population is forecasted to dramatically increase,  
5  
6 additional information on the risk versus benefit of intervention will facilitate physician-patient  
7  
8 discussions.  
9  
10

11  
12  
13 This study quantifies clinical and economic outcomes following EMT for AIS in patients older  
14  
15 than 80 years of age across the US. The higher mortality in patients aged over 80 years is in  
16  
17 agreement with the overall worse prognosis seen in the natural history of this age group. For  
18  
19 example, the Specialized Program of Translational Research in Acute Stroke (SPOTRIAS)  
20  
21 examined patients  $\geq 80$  years of age that received intravenous rt-PA and/or intra-arterial  
22  
23 therapy.[9] The database contained more than 1100 patients aged 80 years and greater. It  
24  
25 documented a higher risk of in-hospital mortality for the elder stroke patient (OR: 2.13), but no  
26  
27 difference in mortality rates between intervention modalities. Similarly, data from the European  
28  
29 BIOMED Study of Stroke Care Group and the Safe Implementation of Thrombolysis in Stroke-  
30  
31 Monitoring Study (SITS-MOST) registry reported outcomes from AIS patients aged  $> 80$  years,  
32  
33 and documented higher mortality and worse functional outcomes.[10,11] Specifically, the SITS-  
34  
35 MOST registry documented an increase in mortality by 18% for patients  $> 80$  years, and a 22%  
36  
37 reduction in independence.[11]  
38  
39  
40  
41  
42  
43  
44  
45  
46  
47

48 It is reassuring to note that the population of elderly patients in the present study exhibited  
49  
50 similar mortality in comparison to the above mentioned thrombolysis trials. Patients in the  
51  
52 current study were all treated with EMT, likely for one of two reasons: (1) failure of intravenous  
53  
54 rt-PA to clear a proximal large vessel occlusive lesion, or (2) the individual arrived to the  
55  
56  
57  
58  
59  
60

1  
2  
3 hospital after a prolonged time lapse from symptom onset, thereby leaving EMT as the last line  
4  
5 of therapy within the accepted time windows. Both of these indications represent a group of  
6  
7 exceptionally disease burdened patients.  
8  
9

10  
11  
12 The role of gender in stroke outcomes is not clearly defined. In agreement with our study,  
13  
14 Saposnik et al.[12] reported on 12,262 AIS patients and noted the male sex to be a predictor of  
15  
16 early mortality. Yet, Niewada et al.[13] reported the results of 17,370 AIS patients and  
17  
18 documented that females had higher 14-day and 6-month mortality; while Adams et al.[14]  
19  
20 documented that females had higher 14-day and 6-month mortality; while Adams et al.[14]  
21  
22 collected data on 1,281 AIS patients and found no relationship between outcome and gender.  
23  
24 Further research is warranted to investigate any gender-effects with regard to AIS patients, and  
25  
26 specifically those undergoing EMT.  
27  
28

29  
30  
31 We anticipated increased expenses for the elderly with regard to their overall inpatient admission  
32  
33 due to the larger number of chronic conditions, higher morbidity burden, and diminished  
34  
35 efficiency of rehabilitation.[15,16] It was surprising to note no significant differences in the  
36  
37 economic measures based on age for survivors. If deaths were included, the length-of-stay and  
38  
39 hospital charges were reduced in the elderly population. We believe largely due to increased  
40  
41 utilization of comfort rather than curative measures in the elderly population as evident by their  
42  
43 increased rate of in-hospital mortality. Additionally, though we must point out that our analysis  
44  
45  
46  
47  
48 does not reflect the true societal cost.[17–19] Long-term rehabilitation and care should be  
49  
50 considered in future studies, but these measures were beyond the scope of the anonymized  
51  
52 database used in this study.  
53  
54  
55  
56  
57  
58  
59  
60

1  
2  
3 Due to limitations in the NIS we could not further investigate disease specifics in each  
4  
5 population such as location/size of occlusion, collateral reperfusion, blood glucose level, and  
6  
7 admission NIHSS score.[20–22] These variables are known to affect stroke outcome and the  
8  
9 distribution within each population is unknown. While this is a limitation of the analysis, it is  
10  
11 common to any large database study, and the benefits of large database examination include the  
12  
13 ability to study medical practice at large without selection bias. An additional limitation is that  
14  
15 the primary and secondary objectives do not include any specific neurological or functional  
16  
17 assessment, as these are not recorded in the NIS. Discharge to home was not considered as a  
18  
19 primary objective as this variable may be influenced by the payor status and social factors, rather  
20  
21 than a true assessment of independence and self-care. Lastly, the data collected for NIS predates  
22  
23 the arrival of stent-retriever devices, which may prove to be safer and more efficacious than  
24  
25 previous generation devices.  
26  
27  
28  
29  
30  
31  
32  
33

## 34 CONCLUSION

35  
36 EMT for AIS patients older than 80 years of age resulted in significantly increased inpatient  
37  
38 mortality in comparison to their younger counterparts. This is consistent with the overall worse  
39  
40 prognosis seen in the natural history of this age group. Studies to better identify patients that  
41  
42 would benefit from EMT may improve outcomes and reduce the gap currently observed in age  
43  
44 stratifications. Ongoing endeavors to develop new revascularization devices may also improve  
45  
46 AIS outcomes after EMT.  
47  
48  
49  
50  
51  
52  
53  
54  
55  
56  
57  
58  
59  
60

1  
2  
3 **Conflicts-of-interest/Disclosures:** MRV: none. AS: none. DJP: none. EMD is a physician  
4 consultant for MicroVention, Covidien Neurovascular, Integra LifeSciences Corporation, and  
5 McKesson Health Solutions.  
6  
7  
8

9  
10 **Contributor statement:** EMD and MV: study concept and design. MRV: acquisition of the  
11 data. MRV, AS, DJP, and EMD: analysis and interpretation of the data. MRV and EMD: drafting  
12 of the manuscript. AS and DJP: critical revision of the manuscript for important intellectual  
13 content. EMD: guarantor.  
14  
15  
16  
17

18  
19  
20 **Funding:** None  
21

22 **Ethics approval:** This study used the Nationwide Inpatient Sample, a de-identified patient  
23 database. Therefore, this study did not require IRB review in accordance with the Code of  
24 Federal Regulations, 45 CFR 46.  
25  
26  
27

28  
29 **Data sharing statement:** Data were generated from the Nationwide Inpatient Sample, a  
30 publicly-available database. There is no additional data available.  
31  
32  
33  
34  
35  
36  
37  
38  
39  
40  
41  
42  
43  
44  
45  
46  
47  
48  
49  
50  
51  
52  
53  
54  
55  
56  
57  
58  
59  
60

## REFERENCES

- 1 Broderick JP, Palesch YY, Demchuk AM, *et al.* Endovascular therapy after intravenous t-PA versus t-PA alone for stroke. *N Engl J Med* 2013;**368**:893–903. doi:10.1056/NEJMoa1214300
- 2 Ciccone A, Valvassori L, Nichelatti M, *et al.* Endovascular treatment for acute ischemic stroke. *N Engl J Med* 2013;**368**:904–13. doi:10.1056/NEJMoa1213701
- 3 Kidwell CS, Jahan R, Gornbein J, *et al.* A trial of imaging selection and endovascular treatment for ischemic stroke. *N Engl J Med* 2013;**368**:914–23. doi:10.1056/NEJMoa1212793
- 4 Office of the Actuary in the centers for Medicare and Medicaid services. NHE projections 2008-2018. Centers Medicare Medicaid Serv. <http://www.cms.hhs.gov/nationalhealthexpenddata/downloads/proj2008.pds> (accessed 13 Feb2013).
- 5 Vincent G, Velkoff V. The next four decades: the older population in the United States: 2010 to 2050 CPR. *Us Census Bur* 2010;**25**:1138.
- 6 Kimball MM, Neal D, Waters MF, *et al.* Race and Income Disparity in Ischemic Stroke Care: Nationwide Inpatient Sample Database, 2002 to 2008. *J Stroke Cerebrovasc Dis* Published Online First: 17 July 2012. doi:10.1016/j.jstrokecerebrovasdis.2012.06.004
- 7 Elixhauser A, Steiner C, Harris DR, *et al.* Comorbidity measures for use with administrative data. *Med Care* 1998;**36**:8–27.
- 8 Vogel TR, Dombrovskiy VY, Haser PB, *et al.* Outcomes of carotid artery stenting and endarterectomy in the United States. *J Vasc Surg* 2009;**49**:325–330; discussion 330. doi:10.1016/j.jvs.2008.08.112
- 9 Willey JZ, Ortega-Gutierrez S, Petersen N, *et al.* Impact of acute ischemic stroke treatment in patients >80 years of age: the specialized program of translational research in acute stroke (SPOTRIAS) consortium experience. *Stroke* 2012;**43**:2369–75. doi:10.1161/STROKEAHA.112.660993
- 10 Di Carlo A, Lamassa M, Pracucci G, *et al.* Stroke in the very old: clinical presentation and determinants of 3-month functional outcome: A European perspective. European BIOMED Study of Stroke Care Group. *Stroke* 1999;**30**:2313–9.
- 11 Ford GA, Ahmed N, Azevedo E, *et al.* Intravenous alteplase for stroke in those older than 80 years old. *Stroke* 2010;**41**:2568–74. doi:10.1161/STROKEAHA.110.581884
- 12 Saposnik G, Kapral MK, Liu Y, *et al.* IScore: a risk score to predict death early after hospitalization for an acute ischemic stroke. *Circulation* 2011;**123**:739–49. doi:10.1161/CIRCULATIONAHA.110.983353

- 13 Niewada M, Kobayashi A, Sandercock PAG, *et al.* Influence of gender on baseline features and clinical outcomes among 17,370 patients with confirmed ischaemic stroke in the international stroke trial. *Neuroepidemiology* 2005;**24**:123–8. doi:10.1159/000082999
- 14 Adams HP Jr, Davis PH, Leira EC, *et al.* Baseline NIH Stroke Scale score strongly predicts outcome after stroke: A report of the Trial of Org 10172 in Acute Stroke Treatment (TOAST). *Neurology* 1999;**53**:126–31.
- 15 Popa-Wagner A, Carmichael ST, Kokaia Z, *et al.* The response of the aged brain to stroke: too much, too soon? *Curr Neurovasc Res* 2007;**4**:216–27.
- 16 Alemayehu B, Warner KE. The Lifetime Distribution of Health Care Costs. *Health Serv Res* 2004;**39**:627–42. doi:10.1111/j.1475-6773.2004.00248.x
- 17 Dewey HM, Thrift AG, Mihalopoulos C, *et al.* Cost of stroke in Australia from a societal perspective: Results from the North East Melbourne Stroke Incidence Study (NEMESIS). *Stroke* 2001;**32**:2409–16.
- 18 Kolominsky-Rabas PL, Heuschmann PU, Marschall D, *et al.* Lifetime cost of ischemic stroke in Germany: Results and national projections from a population-based stroke registry - The Erlangen Stroke Project. *Stroke* 2006;**37**:1179–83. doi:10.1161/01.STR.0000217450.21310.90
- 19 Lee WC, Christensen MC, Joshi AV, *et al.* Long-term cost of stroke subtypes among medicare beneficiaries. *Cerebrovasc Dis* 2007;**23**:57–65. doi:10.1159/000096542
- 20 Costalat V, Lobotesis K, Machi P, *et al.* Prognostic factors related to clinical outcome following thrombectomy in ischemic stroke (RECAST Study). 50 patients prospective study. *Eur J Radiol* Published Online First: 30 August 2012. doi:10.1016/j.ejrad.2012.07.012
- 21 Ishkanian AA, McCullough-Hicks ME, Appelboom G, *et al.* Improving patient selection for endovascular treatment of acute cerebral ischemia: a review of the literature and an external validation of the Houston IAT and THRIVE predictive scoring systems. *Neurosurg Focus* 2011;**30**:E7. doi:10.3171/2011.3.FOCUS1144
- 22 Natarajan SK, Dandona P, Karmon Y, *et al.* Prediction of adverse outcomes by blood glucose level after endovascular therapy for acute ischemic stroke. *J Neurosurg* 2011;**114**:1785–99. doi:10.3171/2011.1.JNS10884

**Table 1.** Patient- and hospital-level characteristics of the population receiving mechanical thrombectomy for acute ischemic stroke compared between the elderly and their younger counterpart.

|                                                                                                        | ≤ 80 yrs<br>(n = 7614 cases)    | > 80 yrs<br>(n = 1686 cases)    | P               |
|--------------------------------------------------------------------------------------------------------|---------------------------------|---------------------------------|-----------------|
| Age                                                                                                    | 63 (53-73)                      | 84 (82-87)                      |                 |
| Gender, female                                                                                         | 46.9%                           | 66.7%                           | <.001           |
| Race, white                                                                                            | 60.2%                           | 67.6%                           | .013            |
| Median income level                                                                                    |                                 |                                 |                 |
| <\$39,000                                                                                              | 26.7%                           | 23.5%                           |                 |
| \$39,000 to \$47,999                                                                                   | 24.8%                           | 25.6%                           |                 |
| \$48,000 to \$62,999                                                                                   | 23.6%                           | 23.5%                           | .607            |
| ≥\$63,000                                                                                              | 24.9%                           | 27.4%                           |                 |
| Payer, Medicare                                                                                        | 44.9%                           | 90.5%                           | <.001           |
| Elixhauser comorbidity score                                                                           |                                 |                                 |                 |
| ≤ 2                                                                                                    | 37.2%                           | 30.6%                           |                 |
| 3                                                                                                      | 21.7%                           | 26.5%                           | <.001           |
| ≥ 4                                                                                                    | 41.1%                           | 42.9%                           |                 |
| APR-DRG severity of illness                                                                            |                                 |                                 |                 |
| Mild                                                                                                   | 0%                              | 0%                              |                 |
| Moderate                                                                                               | 1.5%                            | 0.6%                            |                 |
| Major                                                                                                  | 53.5%                           | 53.9%                           | .418            |
| Extreme                                                                                                | 45.0%                           | 45.5%                           |                 |
| Thrombolysis (intravenous or intra-arterial)                                                           | 55.5%                           | 63.1%                           | .013            |
| Length of stay, days ( <u>survivors</u> )                                                              | 9 (5-14)                        | 9 (6-13.6)                      | .711            |
| <u>Length of stay, days (all patients)</u>                                                             | <u>8 (4-13)</u>                 | <u>8 (4-12)</u>                 | <u>.004</u>     |
| Total charges, \$ ( <u>survivors</u> )                                                                 | 137,692 (95,139-207,687)        | 137,756 (87,582-198,103)        | .021            |
| <u>Total charges, \$ (all patients)</u>                                                                | <u>132,828 (90,661-205,835)</u> | <u>126,238 (86,230-188,294)</u> | <u>&lt;.001</u> |
| Discharged home                                                                                        | 12.7%                           | 2.1%                            | <.001           |
| Inpatient mortality                                                                                    | 21.6%                           | 33.7%                           | <.001           |
| Hospital owner                                                                                         |                                 |                                 |                 |
| Government, non-federal                                                                                | 22.6%                           | 18.8%                           |                 |
| Private, non-profit                                                                                    | 69.2%                           | 74.6%                           | .150            |
| Private, investor-own                                                                                  | 8.2%                            | 6.6%                            |                 |
| Teaching hospital                                                                                      | 84.2%                           | 80.6%                           | .122            |
| Continuous variables expressed as: median (25 <sup>th</sup> percentile – 75 <sup>th</sup> percentile). |                                 |                                 |                 |



**Figure Legend:**

**Figure 1.** Multivariate analysis of inpatient mortality and economic measures for survivors. Inpatient mortality expressed as the odds ratio along with the 95% confidence interval derived from binary logistic regression. Length of stay and charges are both expressed using the exponential parameter estimate along with the 95% confidence interval derived from generalized estimating equations. P-values are adjacent to the 95% confidence intervals. Points to the right of 1.0 reflect an increase in the odds/effect ratio relative to the indicated reference category. Points to the left of 1.0 reflect a decrease in the odds/effect ratio relative to the indicated reference category.

1  
2  
3  
4  
5  
6  
7  
8  
9  
10  
11  
12  
13  
14  
15  
16  
17  
18  
19  
20  
21  
22  
23  
24  
25  
26  
27  
28  
29  
30  
31  
32  
33  
34  
35  
36  
37  
38  
39  
40  
41  
42  
43  
44  
45  
46  
47  
48  
49  
50  
51  
52  
53  
54  
55  
56  
57  
58  
59  
60

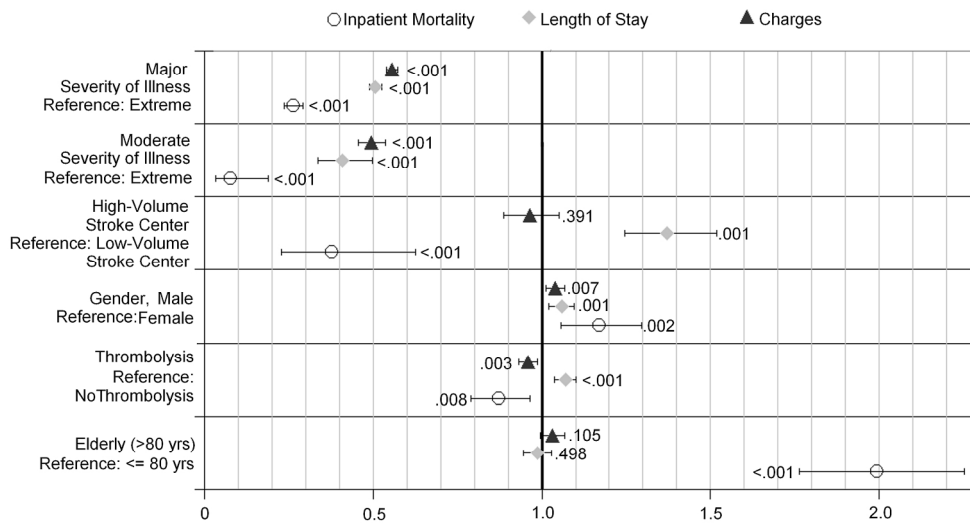

Multivariate analysis of inpatient mortality and economic measures. Inpatient mortality expressed as the odds ratio along with the 95% confidence interval derived from binary logistic regression. Length of stay and charges are both expressed using the exponential parameter estimate along with the 95% confidence interval derived from generalized estimating equations. P-values are adjacent to the 95% confidence intervals. Points to the right of 1.0 reflect an increase in the odds/effect ratio relative to the indicated reference category. Points to the left of 1.0 reflect a decrease in the odds/effect ratio relative to the indicated reference category.  
163x92mm (300 x 300 DPI)
